1

2       **The ParB clamp docks onto Smc for DNA loading via a joint-ParB interface**

3

4

5

6       Florian P. Bock, Anna Anchimiuk, Marie-Laure Diebold-Durand, Stephan Gruber\*

7

8       Department of Fundamental Microbiology (DMF), Faculty of Biology and Medicine (FBM), University

9       of Lausanne, 1015 Lausanne, Switzerland

10

11       \* Corresponding author, Lead contact: [stephan.gruber@unil.ch](mailto:stephan.gruber@unil.ch)

12

13

14

15       Running title: **ParB-Smc association.**

16

17       Keywords: Smc, condensin, DNA loop extrusion, ParB, ParABS, chromosome segregation.

18

19 **Abstract**

20

21 Chromosomes readily unlink from one another and segregate to daughter cells during cell division  
22 highlighting a remarkable ability of cells to organize long DNA molecules. SMC complexes mediate  
23 chromosome folding by DNA loop extrusion. In most bacteria, SMC complexes start loop extrusion at  
24 the ParB/*parS* partition complex formed near the replication origin. Whether they are recruited by  
25 recognizing a specific DNA structure in the partition complex or a protein component is unknown. By  
26 replacing genes in *Bacillus subtilis* with orthologous sequences from *Streptococcus pneumoniae*, we  
27 show that the three subunits of the bacterial SMC complex together with the ParB protein form a  
28 functional module that can organize and segregate chromosomes when transplanted into another  
29 organism. Using chimeric proteins and chemical cross-linking, we find that ParB binds to the SMC  
30 subunit directly. We map a binding interface to the SMC joint and the ParB CTP-binding domain.  
31 Structure prediction indicates how the ParB clamp presents DNA to the SMC complex to initiate DNA  
32 loop extrusion.

33

34

## 35 Introduction

36 Organizing DNA for chromosome segregation is a fundamental challenge across all domains of life.  
37 Structural maintenance of chromosomes (SMC) complexes fold DNA into a loop or an arrangement of  
38 multiple loops via a process dubbed DNA loop extrusion (Yatskevich et al., 2019). They are ubiquitously  
39 found in the domains of life. Three types of SMC complexes with dedicated functions (*i.e.* Smc5/6,  
40 cohesin and condensin) are nearly universal in eukaryotes (Yoshinaga and Inagaki, 2021). In  
41 prokaryotes, the Smc-ScpAB complex is predominant—being widely distributed in bacteria and  
42 present in some archaea. Disruption of any of the three subunits of Smc-ScpAB results in a strong  
43 chromosome segregation defect in *B. subtilis*, ultimately leading to cell death when cells are grown on  
44 nutrient-rich medium that promotes fast DNA replication (Gruber et al., 2014). The other bacterial  
45 SMC variants, MukBEF and MksBEF(G), are highly diverged with the latter supporting plasmid  
46 restriction rather than chromosome segregation in some bacteria (Panas et al., 2014; Petrushenko et  
47 al., 2011).

48 The Smc-ScpAB complex is recruited to the replication origin region of the bacterial chromosome by  
49 16 bp palindromic '*parS*' DNA sequences that associate with the ParB protein (Gruber and Errington,  
50 2009; Sullivan et al., 2009). Smc-ScpAB then starts translocating onto *parS*-flanking DNA in both  
51 orientations (Figure 1A). This bidirectional DNA translocation (*i.e.* DNA-loop-extrusion) brings together  
52 loci distantly located on opposing chromosome arms (Tran et al., 2017; Wang et al., 2017), which is  
53 thought to help separate the nascent sister chromosomes, presumably by removing DNA  
54 entanglements in the wake of the DNA replication forks (Bürmann and Gruber, 2015). How Smc-ScpAB  
55 recognizes the *parS* loading site, how it loads onto DNA, and how it starts loop extrusion is poorly  
56 understood.

57 ParABS systems promote the partitioning of bacterial chromosomes and the stable maintenance of  
58 low copy-number plasmids. They comprise the *parS* sites, the ParA ATPase, and the ParB CTPase. ParB  
59 protein locally enriches in a 'partition complex' by binding the cofactor CTP and clamping onto *parS*  
60 DNA (**Figure 1A**). The clamps then spread onto flanking DNA by 1D diffusion and recruit further ParB  
61 dimers, before eventually unloading from the chromosome upon CTP hydrolysis (Antar et al., 2021;  
62 Jalal et al., 2021; Osorio-Valeriano et al., 2021; Soh et al., 2019; Tišma et al., 2021). ParB comprises  
63 three globular domains (**Figure 2B**). The amino-terminal "N domain" harbors the CTP binding pocket.  
64 It homodimerizes upon contact with *parS* DNA thus closing the ParB clamp. The middle "M domain"  
65 includes a helix-turn-helix motif which specifically recognizes *parS* DNA (Chen et al., 2015). The  
66 carboxy-terminal "C domain" serves to dimerize two ParB monomers and also promotes sequences-  
67 nonspecific DNA binding (Fisher et al., 2017; Schumacher and Funnell, 2005). ParA forms gradients on  
68 the bacterial chromosome along which the partition complexes move to equiposition themselves

69 (Hwang et al., 2013; Lim et al., 2014). This requires stimulation of ParA ATP hydrolysis by an N-terminal  
70 peptide on ParB, which converts DNA-bound ParA dimers into cytosolic monomers (Gruber and  
71 Errington, 2009; Scholefield et al., 2011; Zhang and Schumacher, 2017).

72 The Smc protein folds into a highly elongated particle having an ABC-type ATPase “head” domain at  
73 one end and a dimerization “hinge” domain at the other end of a long intramolecular antiparallel  
74 coiled-coil “arm” (**Figure 1A**) (Haering et al., 2002). The kleisin protein ScpA connects the head domain  
75 of one Smc subunit to the head-proximal arm (“neck”) of the other, together forming a ring-shaped  
76 protein complex capable of entrapping chromosomal DNA (Bürmann et al., 2013; Gligoris et al., 2014;  
77 Wilhelm et al., 2015). Two ScpB proteins—belonging to the kite family—bind to the central region of  
78 ScpA (Palecek and Gruber, 2015). The two long arms co-align to form a rod-shaped particle with mis-  
79 aligned head domains. ATP-engagement of the head domains in turn pulls the arms apart, thus  
80 creating a more open ring-shaped particle (Vazquez Nunez et al., 2021) (**Figure 1A**). An essential DNA  
81 binding interface is formed by ATP-engaged Smc head domains. How DNA is clamped at the Smc  
82 heads, and how DNA binding and ATP hydrolysis promote loop extrusion is not well understood  
83 (Vazquez Nunez et al., 2019).

84 Recruitment of Smc-ScpAB by the partition complex relies on several factors. The Smc heads have to  
85 bind ATP and engage with one another, while ATP hydrolysis by Smc is dispensable (Minnen et al.,  
86 2016). The hydrolysis-defective mutant Smc(E1118Q) (“EQ”) efficiently targets to *parS* DNA, especially  
87 when arm alignment is artificially weakened (e.g. by mutations preventing hinge dimerization). The  
88 accumulation of Smc(EQ) at *parS* DNA requires DNA clamping by ATP-engaged Smc heads (Vazquez  
89 Nunez *et al.*, 2019). DNA clamping by ParB is also essential for Smc recruitment, while CTP hydrolysis  
90 is dispensable (Antar *et al.*, 2021). Altogether, this suggests that an open, ATP-bound, DNA-clamping  
91 state of Smc-ScpAB associates with a ParB DNA sliding clamp. The interface between Smc-ScpAB and  
92 ParB however has remained elusive, possibly owing to a weak and transient nature of the interaction  
93 or the dependence on a cofactor. Also, the relationship of DNA in the ParB clamp and the Smc clamp  
94 is unclear.

95 Here we provide conclusive evidence that ParABS promotes chromosome folding via a direct protein-  
96 protein interaction between the ParB protein and the Smc-ScpAB complex. Using chimeric proteins  
97 and site-specific *in vivo* crosslinking we identify the key residues for specifying the interaction. These  
98 residues are located on the Smc joint and the recently discovered CTP-controlled DNA-gate domain of  
99 ParB (Antar *et al.*, 2021; Soh *et al.*, 2019). Structure prediction provides detailed insights into how the  
100 ParB clamp feeds DNA into the Smc-ScpAB complex for loop extrusion. We furthermore demonstrate  
101 that the Smc-ScpAB and ParB/*parS* complexes together form a minimal system for chromosome  
102 folding and segregation that can be transplanted from one bacterial species to another.



103 **Results**

104

105 **A four-gene module from *S. pneumoniae* promotes chromosome segregation in *B. subtilis***

106 To determine the minimal set of factors needed to organize and segregate chromosomes in bacteria,  
107 we replaced genes encoding for components of the *B. subtilis* (*Bsu*) Smc holo-complex for orthologous  
108 counterparts. As gene donor, we chose *S. pneumoniae* (*Spn*) which belongs to the same branch of  
109 Gram-positive bacteria (the firmicutes) and also relies on Smc-ScpAB for chromosome segregation  
110 (Minnen et al., 2011). The Smc genes for example display only 38 % amino acid sequence identity,  
111 showing that the two species have substantially diverged and implying that the respective interaction  
112 partners significantly co-evolved. Substituting the *scpAB* operon, which encodes for the ScpA and ScpB  
113 subunits, or the *smc* gene by the respective *Spn* orthologs lead to severe growth defects on nutrient  
114 rich medium similar to the  $\Delta smc$  mutant (**Figure 1B**). Combining the *smc* and *scpAB* genes of *Spn* origin  
115 only marginally improved growth on nutrient-rich medium, demonstrating that the genes encoding  
116 for the subunits of the *Spn* Smc complex alone or in combination (<sup>*Spn*</sup>Smc-ScpAB') are unable to  
117 support chromosome segregation in *B. subtilis*. Chromosome folding was also altered in the <sup>*Spn*</sup>Smc-  
118 ScpAB strain as judged from 3C-Seq contact maps (**Figure 1C**). Like in the  $\Delta parB$  mutant, contacts along  
119 the secondary diagonal originating from arm-arm co-alignment by Smc-ScpAB are missing (**Figure**  
120 **1C**)(Wang et al., 2017). <sup>*Bsu*</sup>Smc-ScpAB however loads onto the chromosome sporadically even in the  
121 absence of ParB, leading to residual contacts across the chromosome arms, which are widely  
122 distributed in the inter-arm (top-right and bottom-left) quadrants of the  $\Delta parB$  contact map. Residual  
123 loop extrusion activity by <sup>*Bsu*</sup>Smc-ScpAB starting from random positions may thus support  
124 chromosome segregation and cell viability in the  $\Delta parB$  strain. <sup>*Spn*</sup>Smc-ScpAB apparently fails to  
125 productively load onto the chromosome at *parS* or elsewhere (as evident from the clear reduction of  
126 inter-arm contacts) and is thus unable to support chromosome segregation.

127 One explanation for the strong phenotypes associated with <sup>*Spn*</sup>Smc-ScpAB might be its inability to  
128 interact with one or more host factors in *B. subtilis*. Known factors include the ParB protein and the  
129 *parS* sites—that together form the partition complex targeting Smc-ScpAB to the replication origin  
130 region in *B. subtilis* and in *S. pneumoniae* (Gruber and Errington, 2009; Minnen et al., 2011; Sullivan et  
131 al., 2009). While the function of endogenous <sup>*Bsu*</sup>Smc-ScpAB does not strictly require ParB or *parS*,  
132 <sup>*Spn*</sup>Smc-ScpAB may rely on cognate ParB even for basal functions in *B. subtilis*. To test this possibility,  
133 we next substituted the *parB* gene. We added a *Spn parS* site at the 3' end of *Spn parB* (**Supplementary**  
134 **Figure 2A**) because the *Bsu parB* gene harbours an internal *parS* sequence (Minnen et al., 2011). *S.*  
135 *pneumoniae* does not encode for ParA, and its ParB sequence lacks the N-terminal extension that  
136 normally stimulates ATP hydrolysis by ParA (Gruber and Errington, 2009; Leonard et al., 2005). To

137 eliminate any detrimental effect by unregulated *Bsu* ParA (Murray and Errington, 2008; Quisel and  
138 Grossman, 2000), we thus excluded the first 20 amino acids of the *Bsu parB* gene from any *Bsu/Spn*  
139 chimeric ParB sequences and also deleted the neighboring *parA* gene. As expected from the weak  
140 growth phenotypes of  $\Delta parB$ , these modifications on their own did not noticeably alter cell viability  
141 (but caused a change in colony morphology) (**Figure 1B**). Introducing *Spn* ParB into strains already  
142 harboring *Spn* Smc and *Spn* ScpAB resulted in much improved growth on nutrient-rich medium with  
143 the viability and growth being comparable to wild-type cells (**Figure 1B**). Likewise, 3C-Seq analysis  
144 showed increased levels of contacts across the left and the right chromosome arm (when relevant  
145 parts of ParB comprised the *Spn* sequence; see below) (**Figure 1C**). The levels of these contacts were  
146 still reduced when compared to wild type, and their distribution was broadened implying that <sup>*Spn*</sup>Smc-  
147 ScpAB is less efficient or less organized in forming these contacts (with all *parS* sites or only two *parS*  
148 sites present) (Anchimiuk et al., 2021). Nevertheless, these results demonstrate that <sup>*Spn*</sup>Smc-ScpAB is  
149 principally capable of organizing the chromosome for efficient segregation in *B. subtilis*, but only when  
150 being targeted to the replication origin region by its cognate <sup>*Spn*</sup>ParB.

151 These findings show that Smc-ScpAB collaborates only with ParABS to organize chromosomes in two  
152 distantly related bacteria. Functional interactions of four proteins—ParB, Smc, ScpA and ScpB—are  
153 needed for proper chromosome folding. Sequence divergence prevents productive protein-protein  
154 interaction across the two species rendering the *Bsu* and *Spn* modules orthogonal to one another. The  
155 critical involvement of other host proteins in chromosome folding by Smc is moreover highly unlikely,  
156 as such factors would have to fruitfully interact with *Bsu* and *Spn* proteins despite their divergent  
157 sequences.

158

### 159 **Smc binds to the N-terminal CTP-binding domain of ParB**

160 We next made use of the orthogonality of the chromosome folding modules to map protein binding  
161 interfaces between ParB and Smc-ScpAB. We engineered chimeric proteins having either amino- or  
162 carboxy-terminal *Bsu* ParB sequences exchanged for the corresponding *Spn* sequence (**Figure 2A**). The  
163 junctions of the chimeric proteins were chosen in regions of low sequence conservation and at domain  
164 boundaries to try to minimize protein folding problems (**Figure 2B**). A GFP-tagged variant of the ParB  
165 chimera <sup>*Spn*</sup>198-C showed clear focal localization suggesting that it self-loads onto *parS* DNA efficiently  
166 (**Figure 2C, Supplementary Figure 2B**) (Glaser et al., 1997). The GFP-tagged versions of chimera <sup>*Spn*</sup>N-  
167 197 and of full-length *Spn* ParB also displayed focal localization, albeit with the foci being more diffuse  
168 as previously observed with ParB-GFP in *S. pneumoniae* (**Supplementary Figure 2C**) (Kjos and Veening,  
169 2014; Minnen *et al.*, 2011). As expected, none of the chimeric ParB proteins led to obvious growth  
170 phenotypes in otherwise wild-type strains. When introduced into a <sup>*Spn*</sup>Smc-ScpAB strain, however, all

171 chimeric ParB proteins with amino-terminal regions of *Spn* origin (*Spn*N-83, *Spn*N-197 and *Spn*N-199)  
172 promoted robust growth on nutrient-rich medium (**Figure 2D**). When instead the ParB carboxy-  
173 terminus originated from *S. pneumoniae* (*Spn*84-C, *Spn*198-C and *Spn*200-C) the strains showed poor  
174 growth on nutrient-rich medium as with full-length *Bsu* ParB (**Figure 2D**). These observations strongly  
175 suggest that the CTP-binding domain of ParB is responsible for a direct physical and functional  
176 interaction with Smc-ScpAB. The 3C-Seq analysis mentioned above is consistent with this notion as it  
177 showed increased trans-chromosome arm contacts in *Spn*Smc-ScpAB when *Spn*N-83 was also present  
178 (**Figure 1C**).

179

### 180 **Identifying ParB residues critical for Smc association**

181 To elucidate how Smc and ParB may orient one another, we next set out to fine-map the Smc binding  
182 interface on ParB by identifying which *Spn* ParB residues are required to support the action of *Spn*Smc-  
183 ScpAB in *B. subtilis*. There are thirty-eight residue differences across the relevant amino-terminal part  
184 of *Bsu* and *Spn* ParB. We focused on surface-exposed residues and grouped them into four patches  
185 for mutagenesis (denoted as 1 to 4) (**Figure 3A**). Exchange of all four patches in *Bsu* ParB led to robust  
186 growth of the *Spn*Smc-ScpAB strain (**Figure 3B**) comparable to full exchange of the amino-terminal  
187 sequence (*Spn*N-83), indicating that the residue differences (8 in total) outside the chosen patches are  
188 not critically relevant. Strains harboring *Spn* residues only in three of the four patches should exhibit  
189 different growth behaviors: A strain harboring *Bsu* residues in patch 1 or in patch 3 failed to grow on  
190 nutrient-rich medium, highlighting their importance for ParB-Smc interaction (**Figure 3B**). A strain  
191 harboring *Bsu* residues only in patch 2 showed good growth, while a strain with a *Bsu* patch 4 displayed  
192 an intermediate phenotype indicating that patch 4 is somewhat important while patch 2 is largely  
193 dispensable. We conclude that residues from patches 1, 3, and 4 are noticeably contributing to the  
194 interaction with Smc.

195 Following the same strategy, we sub-divided these residues into patches 1A, 1B, 1C, 3A, 3B, 4A, and  
196 4B (**Figure 3A**). Converting these patches individually to the *Bsu* sequence demonstrated that residues  
197 in 1B, 3B, 4A, and 4B are largely dispensable for promoting Smc-ParB interaction. On the contrary,  
198 residues in patches 1A, 1C, and 3A appear critical (**Figure 3C**) with the conversion of patch 3A having  
199 a particularly severe impact on growth. 1A, 1C, and 3A together comprise eight residue differences,  
200 which mapped closely together on the surface of the ParB-CDP crystal structure (PDB: 6SDK) (Soh *et*  
201 *al.*, 2019), together delineating a putative Smc-binding interface on ParB (**Figure 3D**). The immediate  
202 proximity of the identified putative binding interface to the CTP-binding pocket supports the notion  
203 that chromosomal loading of Smc is closely linked to ParB CTP binding and hydrolysis and thus  
204 potentially coupled to other cellular activities including DNA replication initiation and ParABS

205 segregation (Antar *et al.*, 2021). Of note, the chimeric ParB proteins (with one exception) performed  
206 well in an Smc-pk3 strain (Gruber and Errington, 2009), that is sensitized for ParB function by the  
207 hypomorphic *smc* allele. This indicates that the chimeric proteins are able to support *Bsu* Smc-ScpAB  
208 function, presumably by enabling ParB-Smc association (**Supplementary Figure 3B**).

209

### 210 **Smc sequences crucial for ParB targeting**

211 We next set out to identify Smc sequences responsible for association with ParB. Previous research  
212 uncovered a minimal Smc fragment that is proficient in *parS* targeting (Minnen *et al.*, 2016). The  
213 fragment included the Smc head domain as well as about seventy amino acids of the head-proximal  
214 coiled-coil. *parS* targeting of this Smc fragment required the Walker B motif mutation E1118Q that  
215 prevents ATP hydrolysis but supports ATP-engagement of heads. Whether the head domain directly  
216 promotes ParB interaction or is merely required for ATP-mediated dimerization of the Smc fragment  
217 or for ATP-dependent DNA binding is however unclear (Vazquez Nunez *et al.*, 2019).

218 Building on available structural information and prior experience with chimeric Smc proteins  
219 (Bürmann *et al.*, 2017; Diebold-Durand *et al.*, 2017), we constructed Smc chimeras with head-proximal  
220 sequences of *Bsu* origin and hinge-proximal sequences of *Spn* origin (**Figure 4A**). Junctions were  
221 chosen within the Smc joint or in its close proximity (ranging from Smc<sub>234</sub>-Smc<sub>248</sub>) with a crystal  
222 structure of the *Bsu* Smc joint (PDB: 5NMO) helping to keep amino- and carboxyterminal sequences  
223 in register (**Figure 4A, Supplementary Figure 4A**). All five chimeric proteins constructed in this fashion  
224 supported viability on nutrient-rich medium (**Supplementary Figure 4B**) implying that they are  
225 expressed and functional. This also highlights the lack of critical physical interactions between distal  
226 Smc parts (e.g. between the hinge and the head domains). Given the robust functioning of these  
227 chimeric proteins in the presence of *Bsu* ParB, we assessed their targeting directly by performing  
228 chromatin immuno-precipitation with antiserum raised against the ScpB protein followed by  
229 quantitative PCR (ChIP-qPCR), which revealed three patterns of distribution. Two chimeric proteins,  
230 Smc<sub>205</sub> and Smc<sub>234</sub>, displayed reduced targeting to origin-proximal sites including the *parS*<sub>359</sub> site as  
231 well as at the *dnaA* and *dnaN* genes similar to the distribution found in a strain lacking *parB* (**Figure**  
232 **4A**). These chimeric proteins thus appear to be unable to functionally interact with *Bsu* ParB. Two  
233 other chimeric proteins, Smc<sub>241</sub> and Smc<sub>248</sub>, showed normal or near-normal distribution. The fifth  
234 construct, Smc<sub>237</sub>, displayed a *parS*-hyper-localization phenotype, suggesting defective protein release  
235 from *parS* sites. Taken together, these results show that sequences in the Smc joint and the  
236 immediately adjacent coiled coil mediate ParB-Smc interactions. The results are consistent with prior  
237 mapping studies based on non-functional and mutated Smc protein fragments (Minnen *et al.*, 2016).

238

### 239 **The Smc joint promotes ParB association**

240 To test whether the Smc joint is sufficient to determine ParB specificity or whether head sequences  
241 are also necessary, we next constructed a chimeric Smc protein having only joint sequences of *Spn*  
242 origin (*<sup>Spn</sup>joint*) (**Figure 4B**). Allelic replacement of *Bsu* Smc against this protein resulted in poor  
243 growth on nutrient-rich medium (**Figure 4B**) albeit noticeably better growth when compared to  $\Delta smc$ .  
244 The *<sup>Spn</sup>joint* protein is thus not fully functional which can likely be ascribed to combining multiple  
245 protein modifications (Smc<sub>205</sub> and Smc<sub>241</sub>). Crucially, when combined with chimeric *parB* alleles having  
246 amino-terminal *Spn* sequences (*<sup>Spn</sup>N-83*, *<sup>Spn</sup>N-197* and *<sup>Spn</sup>N-199*) it supported robust growth, while the  
247 converse *parB* alleles (*<sup>Spn</sup>84-C*, *<sup>Spn</sup>198-C* and *<sup>Spn</sup>200-C*) further decreased viability on nutrient-rich  
248 medium (**Figure 4B**). We found that these growth patterns correlated well with the chromosome  
249 distribution of ScpB in these strains as determined by CHIP-qPCR analysis (**Supplementary Figure 4C**).  
250 Of note, full-length *Spn* ParB did not significantly improve the viability of the *<sup>Spn</sup>joint* strain or the  
251 recruitment of *<sup>Spn</sup>Smc-ScpAB*, possibly indicating that C-terminal ParB sequences might contact Smc-  
252 ScpAB sequences outside the Smc joint and thus contribute to Smc-ParB associations (see below).  
253 Together, the above experiments show that sequences in the Smc joint and the ParB CTP-binding  
254 domain need to be matched to enable productive ParB-Smc contacts. This demonstrates that a direct  
255 physical interaction between these regions is necessary for optimal function. The head domains likely  
256 contribute to the targeting of minimal Smc fragments indirectly, by mediating Smc dimerization and  
257 DNA binding (Vazquez Nunez *et al.*, 2019)

258

### 259 **Proximity of ParB and Smc detected by chemical cross-linking**

260 Finally, we applied *in vivo* cross-linking to complement the genetics and to further fine-map the Smc-  
261 ParB interface. Given the lack of structural information on the interface, we approached the problem  
262 in two steps. We first cross-linked candidate cysteine residues in ParB to lysine residues in Smc using  
263 the heterobifunctional Lys-Cys cross-linker SMCC (**Figure 5A**). In a second step we used the  
264 homobifunctional Cys-Cys cross-linker BMOE (**Figure 5D**) on combinations of ParB(Cys) and Smc(Cys)  
265 mutants. To enhance the fraction of cellular Smc proteins localized at *parS*, (Minnen *et al.*, 2016), we  
266 utilized an EQ mutant also defective in hinge dimer formation (*'mH'*) (Hirano and Hirano, 2002). The  
267 Smc protein also harbored a HaloTag (*'HT'*) for quantitative detection of cross-linked species.  
268 Seventeen residues on the surface of ParB were selected to evenly cover the N-terminal sequence of  
269 ParB (**Figure 5B**). Only when cross-linking with ParB(A29C), ParB(K67C), and ParB(S100C), we observed  
270 an additional, more slowly migrating species of Smc(mH/EQ)-HT (**Figure 5B**). We note that these three  
271 residues happen to localize to patches 1, 3, and 4, respectively (**Figure 3A**). They are closely juxtaposed

272 to each other on the surface of ParB (**Figure 5C**) and presumably also located in proximity of one or  
273 more lysine residue(s) of Smc.

274 To identify the Smc residues that are in proximity of ParB, we selected twenty-five candidate residues  
275 located on both  $\alpha$ -helices of the joint to be mutated to cysteines (**Figure 5E**). The mutations were  
276 generated in the Smc(mH/EQ)-HT protein and combined with the three ParB(Cys) mutants identified  
277 above (**Figure 5F**). To improve the detection of cross-linked products, we enriched for ParB species by  
278 pull-down assays with serum raised against the ParB protein. Comparable results were however  
279 obtained without enrichment (**Supplementary Figure 5B, 5C**). We found comparatively robust cross-  
280 linking with only four Smc(Cys) mutations: K220, K245, K954, and K957 (**Figure 5F, Supplementary**  
281 **Figure 5B, 5C**). These four residues were broadly distributed along the Smc joint and present in both  
282 coiled coil  $\alpha$ -helices. However, all four were exposed on the same side of the Smc joint surface (**Figure**  
283 **5F**).

284

#### 285 **Predicting the structure of the joint-ParB interface**

286 We next applied structure prediction to the minimal interacting sequences as identified by our  
287 mapping experiments (**Figure 6A**). Structure interface prediction became feasible recently with the  
288 advent of AlphaFold-Multimer (AF-Multimer) (Evans et al., 2021). The folds of the two individual  
289 chains of the ParB-Smc structure are predicted with high confidence and the predictions  
290 superimposed well with published crystal structures of the Smc joint (PDB: 5NMO) and ParB NM (PDB:  
291 6SDK), respectively (**Supplementary Figure 6B, C**). AF-Multimer consistently predicted a tightly fitted  
292 heterodimer of the two protein fragments, albeit with a lower level of confidence for the interface  
293 prediction (**Supplementary Figure 6A**). Consistent with our mapping experiments, the ‘joint-ParB’  
294 interface is formed by the ParB N domain and the middle and head-distal regions of the Smc joint. The  
295  $C_{\alpha}$ - $C_{\alpha}$  distances measured for four efficiently cross-linked cysteine pairs (**Supplementary Figure 5B**) (~  
296 8 to 17 Å) fit well in the range for BMOE cross-linking (**Figure 6B**) (Diebold-Durand *et al.*, 2017).  
297 Moreover, ParB residues identified through the matching of sequences in chimeric proteins are found  
298 directly at the interface (**Figure 6C**). The AF-Multimer model thus likely closely resembles the ParB-  
299 Smc structure formed during the recruitment of Smc-ScpAB to the ParB partition complex.



## 300 Discussion

301 Revealing how SMC complexes load onto DNA is vital for a basic understanding of the mechanism of  
302 DNA loop extrusion. Here we provide first insights into how a *bona fide* DNA loading factor (*i.e.* ParB)  
303 delivers DNA to an SMC complex for the initiation of DNA loop extrusion. We identify the joint-ParB  
304 interface as a major determinant for Smc targeting in bacteria.

305

## 306 DNA loading by Smc-ScpAB

307 A key question on the mechanism of DNA loop extrusion is how chromosomal DNA arrives at the DNA  
308 clamping site on top of ATP-engaged head domains (Vazquez Nunez *et al.*, 2019). There are two  
309 possible scenarios (irrespective of SMC-DNA topology) (**Figure 7A**): A DNA double helix is transferred  
310 between disengaged heads and then becomes clamped by ATP-engaging Smc heads (scenario '1' in  
311 Figure 7B). Alternatively, heads first ATP-engage with one another, thus closing the route between the  
312 heads. A loop of DNA then engages directly from the coiled-coil proximal side (scenario '2' in Figure  
313 7B) (Vazquez Nunez *et al.*, 2019). Both scenarios are in principle compatible with the joint-ParB  
314 interface. Passage of DNA between the heads (scenario 1) has been suggested for yeast cohesin based  
315 on a reconstituted DNA loading reaction using purified components (Collier *et al.*, 2020). However, it  
316 is not obvious how the joint-ParB interface would promote or even direct such a passage mechanism  
317 because formation of joint-ParB interface prior to DNA clamping would position DNA across the heads  
318 rather than between them. Also, it is unclear how this would lead to entrapment of chromosomal DNA  
319 by the Smc-ScpA ring (Vazquez Nunez *et al.*, 2019). The entry of DNA at the top of the heads (scenario  
320 2) has been suggested for DNA-end recognition by Rad50-Mre11 (Käshammer *et al.*, 2019). At a DNA  
321 double strand break, the DNA end can thread into the interarm space. In case of Smc-ScpAB, however,  
322 a pre-formed DNA bend or loop has to thread into the interarm space. It is conceivable that such loops  
323 readily form in the partition complex. In case of phage P1, DNA between *parS* site motifs is bent  
324 significantly at a IHF protein binding site (Surtees and Funnell, 2001). Moreover, trans-contacts  
325 between ParB clamps may form or stabilize such loops. The joint-ParB interface seems to be ideally  
326 positioned to guide a DNA loop into an opened SMC compartment, although the details of the DNA  
327 passage remain largely unclear.

328 The symmetric nature of the bacterial Smc dimer (**Figure 7A**) allows for two joint-ParB interfaces on  
329 the asymmetric Smc-ScpAB holo-complex. ParB may either bind on the same side as ScpAB ('front'),  
330 which would likely result in a steric clash since the middle part of ScpAB occupies a similar area on top  
331 of ATP-engaged Smc heads (**Figure 7A**) (according to the position of the corresponding kite subunits  
332 in DNA-clamping MukBEF) (Bürmann *et al.*, 2021). Alternatively, ParB may approach from the other  
333 side ('back') and thus avoid a steric clash. However, in this scenario, subsequent DNA translocation

334 (without prior conversion to a topological DNA-Smc association – ‘loading’) would evict the newly  
335 captured DNA loop from the Smc complex and thus be counterproductive at least according to the  
336 DNA-segment-capture model (Diebold-Durand *et al.*, 2017; Marko *et al.*, 2019; Nomidis *et al.*, 2021).  
337 We thus propose that ParB substitutes for ScpAB in DNA clamping during chromosomal loading,  
338 possibly analogous to Pds5 substituting for Scc2 in cohesin unloading from DNA (Wells *et al.*, 2017).  
339 We previously found that ScpA is not required for *parS*-targeting of the Smc(EQ-mH) protein (Minnen  
340 *et al.*, 2016). This option is also supported by experiments with engineered asymmetric Smc dimers  
341 which harbor only the joint in the  $\nu$ -Smc protein substituted for *Spn* sequences (**Supplementary Figure**  
342 **7A**) (Bürmann *et al.*, 2013). However, the results are not fully conclusive because the joint substitution  
343 in the  $\kappa$ -Smc also performs well with one particular chimeric ParB allele, probably indicating that  
344 multiple ParB-Smc contacts or multiple ParB-Smc states together support loading (**Supplementary**  
345 **Figure 7B**).

346 The inherent symmetry of the Smc and ParB dimers may also allow for the simultaneous engagement  
347 of two joint-ParB interfaces, thus possibly stabilizing the Smc-ParB association. Under the reasonable  
348 assumption that the ParB N-M architecture is more or less rigid (Soh *et al.*, 2019), this is only possible  
349 after major reorganization of the Smc coiled coils requiring an X-shaped arrangement of the Smc  
350 proteins in the dimer (**Supplementary Figure 7C**). Whether such an extreme coiled coil configuration  
351 occurs even transiently is doubtful. Another possibility is that a single ParB clamp recruits two Smc  
352 complexes *e.g.* to build a dimeric motor complex for bidirectional translocation. This however also  
353 seems unlikely considering the high local concentration of ParB dimers that would compete for Smc  
354 binding. More likely, the ParB dimer may be handed over from one Smc arm the other as the ParB  
355 clamp threads through the Smc dimer during DNA loading.

356

### 357 **Key functions of the SMC joint in DNA recruitment, loading, translocation and unloading**

358 The SMC joint serves as a key binding platform also in other SMC complexes. MatP protein (bound to  
359 *matS* sites) is an unloading factor for MukBEF, which releases it from the chromosome in the  
360 replication terminus region (Lioy *et al.*, 2018). The AcpP protein has an important stimulatory effect  
361 on the ATPase activity of MukBEF (Josh *et al.*, 2021). Both proteins bind to the joint in MukBEF (the  
362 two joints actually) (Bürmann *et al.*, 2021). The hawk subunit Scc2 is a loading as well as processivity  
363 factor for DNA loop extrusion by cohesin (Davidson *et al.*, 2019). It forms an interface with the Smc3  
364 joint in the DNA-clamping, ATP-engaged state of cohesin (Higashi *et al.*, 2020; Shi *et al.*, 2020). An  
365 equivalent joint-hawk interface is also found in condensin (Lee *et al.*, 2021; Shaltiel *et al.*, 2021). To  
366 understand how closely these joint interfaces might be related to one another, we superimposed the  
367 joint domain in these structures. Superimposition with MukB (PDB: 7NZ3) is challenging due to the



368 significantly diverged structure of the joint (Bürmann *et al.*, 2021). The Smc3 joint (PDB: 6YUF)  
369 superimposed significantly better with the Smc joint and intriguingly showed that the hawk-joint  
370 interface overlaps well with the joint-ParB interface (**Figure 6D**) (Higashi *et al.*, 2020). SMC loading (in  
371 cohesin and Smc-ScpAB), translocation (in cohesin and condensin) as well as SMC unloading (in  
372 MukBEF) are thus linked to related joint interfaces, highlighting the importance of the joint for SMC  
373 DNA transactions. While ParB and hawk proteins are structurally and phylogenetically unrelated, they  
374 use equivalent binding sites on SMC. The binding of co-factors to the joint for DNA clamping might  
375 thus be a general feature of many or all SMC complexes.

376

### 377 **Additional ParB-Smc interfaces?**

378 To identify putative additional contacts between ParB and Smc-ScpAB that may help to guide DNA  
379 into the Smc complex, we ran structure predictions with larger input sequences. In some of the AF-  
380 Multimer predictions, we found the ParB C domain docking onto the side of the Smc heads (via a  
381 'head-ParB interface') (**Figure 7B**, left panels). Intriguingly, in this scenario, the DNA binding surface of  
382 ParB C domain aligns side by side with the DNA binding surface on the Smc heads, implying that the  
383 proteins form a composite DNA binding surface. Other predictions with two chains of Smc (heads only)  
384 and ParB showed a dimer of ParB C domains on top of (pseudo-engaged) Smc heads in a position  
385 normally occupied by clamped DNA (**Figure 7B**, right panel). Together, these predictions indicate that  
386 the flexible nature of the M-to-C connections in the ParB dimer allows for the ParB-clamped DNA to  
387 be located at the Smc heads, either being also clamped by Smc heads or held in place by additional  
388 ParB-Smc contacts. Conceivably, multiple ParB-Smc contacts are formed sequentially as DNA is being  
389 threaded into the Smc compartment.

390

### 391 **The ParB CTP binding domain**

392 The N-terminal CTP-binding domain of ParB has a crucial role in the targeting of Smc to the  
393 chromosome. It is located farthest away from the clamped DNA, thus possibly reaching out from the  
394 partition complex to contact and capture free Smc dimers (**Figure 7A**). In close vicinity lies the  
395 unstructured N-terminal peptide of ParB that stimulates ParA ATP hydrolysis, potentially suggesting a  
396 mutually exclusive binding of ParA and Smc to ParB and antagonistic regulation. Notably, ParA  
397 chromosome segregation requires ParB CTP hydrolysis while Smc recruitment does not, indicating  
398 further opportunities for antagonistic regulation (Antar *et al.*, 2021).

399

### 400 **A minimal system for chromosome folding - dispensability of host factors**

401 We found that the modules for sister chromosome individualization are remarkably robust and able  
402 to segregate chromosomes in a distantly related host bacterium, implying that direct binding of host  
403 factors is dispensable for the essential function. Moreover, such host factors do not interfere with the  
404 basal activity of ParB and Smc-ScpAB. DNA loop extrusion by Smc-ScpAB thus occurs at least partly  
405 unhindered by orthologous obstacles on the chromosome. This implies that overcoming such  
406 obstacles does not require dedicated bypass mechanisms with physical contacts between DNA motor  
407 and obstacle (Anchimiuk *et al.*, 2021; Brandão *et al.*, 2021). Bypassing of DNA binding factors while  
408 forming chromosomal loops thus appears to be an inherent propensity of Smc-ScpAB.

409

#### 410 **Mapping weak binding interfaces by gene transplantation and structure prediction**

411 How the different players in cellular pathways interact with one another to support optimal  
412 coordination of their activities is often poorly understood. We initially aimed to detect the Smc-ParB  
413 interaction by performing biophysical interaction studies (including pull-down, co-elution, anisotropy,  
414 Bio-layer interferometry) using purified components and cofactors. However, all of our attempts were  
415 unsuccessful, possibly owing to the weak and very transient nature of the association or the  
416 dependence on a cofactor or a posttranslational modification. ParB self-concentrates to unusually  
417 high cellular concentrations within the partition complex (estimated to be as high as 10 mM at least  
418 for a plasmid ParB protein) (Guilhas *et al.*, 2020), thus possibly bypassing the need for a high affinity  
419 contact. Considering this high local concentration of ParB, it is conceivable that the dissociation  
420 constant ( $K_D$ ) value for such an interaction is in the high  $\mu$ M or even mM range. A more stable  
421 interaction of ParB and Smc would have limited positive impact upon Smc recruitment but may hinder  
422 or even block its subsequent release. Similar conditions are likely found in proteins undergoing liquid-  
423 liquid phase separation. Our approach based on gene transplantation and cross-linking may be more  
424 widely applicable to study the recruitment of factors by biological condensates formed by liquid-liquid  
425 phase separation (Feng *et al.*, 2019). When combined with structure prediction, this approach may be  
426 particularly powerful.

427 **Acknowledgements**

428 We are grateful to Frank Bürmann for comments on the manuscript and all members of the Gruber  
429 lab for stimulating discussions and feedback. We thank the Jan-Willem Veening lab for help with  
430 imaging. This work was supported by the Swiss National Science Foundation (197770 to S.G.) and the  
431 European Research Council (724482 to S.G.).

432

433 **Competing Interests**

434 The authors declare that they have no competing interests.

435

436 **Author contributions**

437 FB cloned the recombinant DNA constructs, obtained the genetically modified *B. subtilis* strains, and  
438 performed experiments except for 3C-Seq. AA implemented 3C-Seq experiments and analysis. MLDD  
439 established in vivo Lys-Cys crosslinking with SMCC. FB and SG prepared the figures and wrote the  
440 manuscript text with input from all authors. SG supervised the work and obtained funding.

441

442 **Data Availability:**

443 Raw sequencing data obtained in this work can be found on NCBI-SRA (accession number:  
444 GSE190491). All other raw data is available via Mendeley (DOI: 10.17632/3k5sffj2w4.1).

445

446 **Figure legends**

447

448 **Figure 1. A four-component system for chromosome organization in bacteria. A)** Schematic of Smc  
449 recruitment via ParB at *parS* sites (left panels) and chromosome organization of DNA loop extrusion  
450 (right panel). Chromosome, chr.; DNA replication forks, forks. **B)** Viability assessment of gene-  
451 transplanted strains by spotting on nutrient-poor medium (SMG) and nutrient-rich medium (ONA).  
452 Gene identity of strains indicated by colored bars, *Bsu* in blue colors, *Spn* in orange colors. **C)**  
453 Normalized 3C-seq contact maps of strains with indicated genotypes from exponentially growing  
454 cultures. Additional maps are shown in Supplementary Figure 1. All 3C-seq contact maps presented  
455 are divided into 10 kb bins. The replication origin is placed in the middle. The interaction score is in  
456  $\log_{10}$  scale (for more details go to Materials and Methods). Note that the contact map for wild type is  
457 same as in (Anchimiuk *et al.*, 2021).

458

459 **Figure 2. Smc binds the ParB N domain. A)** Sequence alignment of *Bsu* and *Spn* ParB protein  
460 sequences. Identical residues denoted by blue background colors, divergent residues in grey colors.  
461 Construction of ParB chimeras is indicated in red colors at the N to M domain transition and in green  
462 colors for the M to C domain transition. **B)** ParB domain structure. Constructions of chimeras are  
463 indicated by brackets. **C)** Microscopy image of *B. subtilis* cells harbouring the *Spn*Smc-ScpAB with the  
464 *Spn*198-C ParB chimera fused to GFP protein. **D)** Spotting assay of *B. subtilis* strains carrying the *Spn*Smc-  
465 ScpAB as well as the indicated chimeric ParB proteins. As in Figure 1B.

466

467 **Figure 3. Fine mapping of the Smc binding site on ParB. A)** Grouping of ParB residues in patches (1 to  
468 4, top labels) and sub-patches (A, B and C, bottom labels). Sequence alignment of *Bsu* and *Spn* ParB N  
469 domain. As in Figure 2A. **B)** Viability assay by dilution spotting for *Spn*Smc-ScpAB strains carrying  
470 chimeric ParB proteins as given in A). As in Figure 1B. **C)** As in Figure 3B for ParB chimeras with sub-  
471 patches. **D)** Distribution of the identified Smc-interacting residues on the CTP engaged ParB N-domain  
472 dimer in surface plot representation (PDB: 6SDK, (Soh *et al.*, 2019)). ParB chains are shown in blue and  
473 grey colors, respectively. Key residues are indicated and highlighted in yellow, orange, and brown  
474 colors. Notably, the presence of *parA* significantly reduced the viability of some of the strains,  
475 indicating that ParA mis-regulation is indeed not tolerated well by these ParB variants in combination  
476 with *Spn*Smc-ScpAB (**Supplementary Figure 3A**).

477

478

479 **Figure 4. The Smc joint domain targets ParB. A)** Left panel: Schematic (of Smc-ScpAB) and structure  
480 (of the *Bsu* Smc joint) denoting the construction of chimeric Smc proteins, blue colors indicating *Bsu*  
481 sequence identity, orange colors *Spn* origin. Right: Chromatin-immunoprecipitation coupled to  
482 quantitative PCR (ChIP-qPCR) using  $\alpha$ -ScpB serum undertaken with chimeric Smc strains as denoted.  
483 **B)** Left panel: Schematic and structural model of Smc protein displayed as in A. Right: Viability assay  
484 by spotting of strains carrying *Spn* joint in combination with indicated ParB chimeras. As in Figure 1B.  
485 For corresponding ChIP-qPCR results, see Supplementary Figure 4C.

486

487 **Figure 5. In vivo cross-linking supports the interaction interfaces found by genetics. A)** Schematic of  
488 chemical cross-linking by the heterobifunctional molecule SMCC. **B)** Candidate ParB cysteine residues  
489 and their position (in red colors) on the ParB-CDP dimer (with chains in blue and grey colors in surface  
490 representation). **C)** SMCC cross-linking using ParB(Cys) mutants as indicated and detected by in-gel  
491 fluorescence detection of Smc(mH/EQ)-HT ('Smc-HT') protein. Higher molecular weight species  
492 appearing upon cross-linking are indicated by asterisks. **D)** Schematic of BMOE cross-linking chemistry  
493 (top panel) and candidate Smc(Cys) residues and their distribution on the Smc joint structure (in  
494 cartoon representation). **E)** BMOE cross-linking using combinations of ParB(Cys) and Smc(Cys) mutants  
495 as indicated. Samples were enriched for ParB interacting material by incubation with  $\alpha$ -ParB antibody  
496 coupled Dynabeads. Detection by in-gel fluorescence of Smc(mH/EQ)-HT ('Smc-HT') protein. Cross-  
497 linked ParB-Smc species are indicated by asterisks. **F)** Positioning of identified cross-linking residues  
498 on ParB (left panel, as in B) and Smc (right panel, Smc joint in the rod configuration in surface  
499 representation).

500

501 **Figure 6. Structure prediction and comparison. A)** A reconstruction of an Smc-ParB sub-complex  
502 obtained by superimposition of a crystal structure of the ParB NM domain dimer (PDB: 6SDK) with a  
503 joint-ParB heterodimer predicted by AF-Multimer (see Supplementary Figure 6A) in surface  
504 representation in side view (top panel) and top view (bottom panel). The Smc chain is displayed in  
505 grey colors, the ParB chains in dark and light blue colours, respectively. **B)** The Smc-ParB sub-complex  
506 shown in cartoon representation with residues used for cysteine cross-linking experiments displayed  
507 as sticks.  $C_{\alpha}$ - $C_{\alpha}$  distances (in Å) are indicated by dashed lines. **C)** Same as in panel B with Smc and ParB  
508 residues identified by genetic sequence matching displayed in red colors. **D)** Side-by-side comparison  
509 of the joint-ParB interface (left panels) and the joint-Scc2 interface in human cohesin (right panels).  
510 ParB- and Scc2-proximal residues on the Smc and Smc3 joint ( $C_{\alpha}$ - $C_{\alpha}$  distance < 10 Å), respectively, are  
511 indicated in red colors. A Scc2/DNA sub-structure of ATP-engaged human cohesin is displayed (PDB:

512 6YUF) (right panel). Only the Smc3 and Scc2 subunits are shown for simplicity. For direct comparison,  
513 the SMC subunits are also displayed in isolation.

514

515 **Figure 7. Models and low-confidence AF predictions. A)** Putative models for the contact between  
516 ParB-clamped DNA and the Smc dimer. For simplicity, ScpAB is omitted from some representations  
517 and indicated separately in the bottom panels. Two scenarios are considered: DNA passage between  
518 disengaged heads ('1') and insertion of a DNA loop into the Smc interarm space ('2'). The products of  
519 these reactions are shown in the middle and right panels. ParB is shown to interact with the right Smc  
520 (ParB in 'front' of Smc). ScpAB can either be associated on the same side ('front') or other side ('back').  
521 Possible variations of these scenarios with pseudo-topological and non-topological modes of  
522 association between Smc-ScpAB and DNA are not shown for the sake of simplicity. **B)** AF-Multimer  
523 predictions of head-ParB interfaces: input sequences for prediction (1): Smc-head-joint, full-length  
524 ParB and the N-terminal domain of ScpA (left panels); for orientation a second Smc-head-joint protein  
525 is superimposed in an ATP-engaged arrangement (left panel); the putative location of DNA is indicated  
526 (left panel). Input sequences for prediction (2): Smc-head-joint as dimer with the ParB C domains as  
527 dimer. Note that the Smc dimer is predicted in a pseudo-engaged state (despite the absence of ATP).  
528

529 **Supplementary Figure legends**

530

531 **Supplementary Figure 1.** Normalized 3C-seq contact maps of strains with indicated genotypes grown  
532 exponentially as in Figure 1C.

533

534 **Supplementary Figure 2. GFP-tagged chimeric constructs are expressed in *B. subtilis*.** **A)** Sequence  
535 logo for the alignment of *Bsu* and *Spn parS* sites, respectively. **B)** Viability of cells harboring different  
536 *Bsu/Spn* chimeric ParB sequences. As in Figure 1B. **C)** Microscopy image *B. subtilis* cells containing the  
537 *Spn*Smc-ScpAB with either *Spn*N-197 or *Spn*ParB proteins fused to GFP. As in Figure 2C.

538

539 **Supplementary Figure 3. Mapping of ParB residues involved in Smc interaction.** **A)** Spotting assay of  
540 strains carrying *Spn*Smc-ScpAB, ParB chimeras as well as an intact *parA* genes. As in Figure 3C but with  
541 ParA protein being present. **B)** Spotting assay of strains carrying the *Bsu*Smc-pk3 allele as well as *parA*  
542 deletion and ParB chimeras as indicated.

543

544 **Supplementary Figure 4. Construction and analysis of chimeric Smc proteins.** **A)** Alignment of *Bsu*  
545 and *Spn* Smc amino acid sequences. Identical residues are highlighted by blue background. Joint  
546 domain is indicated above. Transitional points between the protein sequences are indicated in orange.  
547 **B)** Viability of strains with Smc chimeras and wt *Bsu* ParB. **C)** Chromatin-immunoprecipitation coupled  
548 to quantitative PCR (ChIP-qPCR) using  $\alpha$ -ScpB serum undertaken on *Spn*joint strains containing ParB  
549 chimera proteins as indicated. Strains identical to the ones used for spotting in Figure 4B.

550

551 **Supplementary Figure 5. Detection of Smc-ParB cross-linking.** **A)** Screening combinations of ParB(Cys)  
552 and Smc(Cys) residues for BMOE cross-linking based on the detection of Smc(mH/EQ)-HT ('Smc-HT')  
553 protein by in-gel fluorescence. **B)** Cross-linking of selected Smc(Cys)-ParB(Cys) combinations as in  
554 Figure 5E but without pre-enrichment by ParB immunoprecipitation. Detection by in-gel fluorescence  
555 of Smc(mH/EQ)-HT protein. Representative gel images are shown (top panel). Quantification of BMOE  
556 cross-linking (bottom panel).

557

558 **Supplementary Figure 6. Structure prediction and superimposition.** **A)** A representative model of the  
559 Smc joint complex with the ParB NM domain fragment obtained by AF-Multimer in cartoon  
560 representation front and back views (left and right panel, respectively). The Smc chain is displayed in  
561 grey colors, the ParB N and M domains in dark and light blue colors, respectively. **B)** Superimposition  
562 of the model shown in A (in grey colors) with the crystal structure of the Smc joint (PDB: 5NMO) (in

563 blue colors). **C)** Superimposition of the model shown in A (in grey colors) with the crystal structure of  
564 the ParB NM domain dimer (PDB: 6SDK) (in blue colors).

565

566 **Supplementary Figure 7. Mapping of ParB residues involved in  $\kappa$ -Smc and  $\eta$ -Smc interactions. A)**

567 Spotting assay of strains carrying two different Smc alleles: an *Spn*Joint gene harboring the I1174E  
568 mutations expressed from the endogenous locus and an ectopic copy of the *Bsu* Smc gene carrying  
569 the V1021E mutation. The V1021E and I1174E point mutations block N-ScpA and C-ScpA binding,  
570 respectively. Only heterodimeric Smc dimers assembly functional Smc-ScpAB complexes. ParB  
571 chimeras as indicated. **B)** As in A but with V1021E and I1174E mutations swapped. **C)** Reconstruction  
572 of a ParB-Smc 2:2 complex using two Smc monomers (rod state) (in light and dark grey colors,  
573 respectively) and the ParB NM crystal structure (PDB: 6SDK) (in light and dark blue colors).



## 574 **Materials and Methods**

### 575 **Strain construction**

576 *B. subtilis* strains utilized in this work originate from the 1A700 isolate. Natural competence was used  
577 to engineer strains at the *smc*, *scpAB*, *parAB* and *amyE* loci by allelic replacement, as described in  
578 (Diebold-Durand et al., 2019). Strains were selected on SMG-agar plates under appropriate antibiotic  
579 selection. Genotypes were verified for single colony isolates by PCR and Sanger sequencing as  
580 required. A list of strains and genotypes are given in Supplementary Table 1. An assignment of strains  
581 to figure panel is listed in Supplementary Table 2.

582

### 583 **Viability assessment by dilution spotting**

584 Cultures were inoculated in SMG medium and grown for 8 hrs at 37 °C under constant agitation.  
585 Cultures were diluted 1:9 in series. Dilutions of 9<sup>2</sup> and 9<sup>5</sup> were spotted on SMG-agar (SMM glucose  
586 glutamate tryptophane) and ONA (Oxoid nutrient agar) plates and grown at 37 °C. Colony growth was  
587 documented by imaging after 16 hrs for ONA plates and 24 hrs for SMG plates.

588

### 589 **Chromosome conformation capture coupled with deep sequencing (3C-seq)**

590 3C-seq was performed essentially as described in (Anchimiuk *et al.*, 2021).

#### 591 *Sample collection*

592 Cultures were grown in SMG at 37 °C in mid-exponential phase (OD<sub>600</sub> = 0.02-0.03) and fixed  
593 with formaldehyde (3% final concentration) for 30 min at RT and 30 min at 4 °C. The formaldehyde  
594 crosslinking was quenched by 30 min incubation with 0.25 M glycine at 4 °C. Finally, the cells were  
595 pelleted by filtration, washed with fresh SMG and frozen in liquid nitrogen for storage at -80 °C.

#### 596 *Cell pellet processing*

597 To lyse the cells, the 3C cell pellets were resuspended in 600 µl 1× TE (Sigma) supplemented with 4 µl  
598 of Ready-lyze lysozyme (35 U/µl, Tebu Bio). After 20 min incubation at RT, SDS was added to a final  
599 concentration of 0.5% and incubated for additional 10 min. 50 µl of lysed cells were aliquoted  
600 to 8 tubes containing 450 µl of digestion mix (1× NEB 1 buffer, 1% triton X-100, and 100  
601 U HpaII enzyme [NEB]) and incubated at 37 °C for 3 hours with constant shaking. Fragmented DNA  
602 was collected by centrifugation, resuspended in 800 µl 1× TE and diluted into 4 tubes containing 8 ml  
603 of ligation mix (1× ligation buffer: 50 mM Tris-HCl, 10 mM MgCl<sub>2</sub>, 10 mM DTT, 1 mM ATP, 0.1 mg/ml  
604 BSA, 125 U T4 DNA ligase 5 U/ml) and incubated at 16°C for 4 hours. Proximity ligation reaction was  
605 followed by O/N decrosslinking at 65°C in the presence of 250 µg/ml proteinase K (Eurobio) and 5 mM  
606 EDTA (Sigma).

#### 607 *DNA purification*

608 To purify the DNA, isopropanol precipitation was performed. Each sample was mixed with 1 volume  
609 of isopropanol and 0.1 volume of 3M NaOAc (pH 5.2, Sigma) and incubated at -80 °C for 1  
610 hour. The DNA was collected by centrifugation and resuspended in 400 µl 1× TE at 30 °C for 20 min.  
611 Next, phenol-chloroform-isoamyl alcohol extraction was performed, followed by final DNA  
612 precipitation using 1.5 volume of cold 100% EtOH in the presence of 0.1 volume of 3M NaOAc at -  
613 80 °C for 30 min. Collected pellets were resuspended in 30 µl 1 x TE and incubated with RNaseA at  
614 37 °C for 30 min. All tubes belonging to the same sample were pooled and the resulting 3C library was  
615 quantified on gel using ImageJ.

#### 616 *Library preparation and sequencing*

617 All 3C libraries were adjusted to 1 µg for library preparation. Each 3C library volume was adjusted to  
618 130 µl and sonicated using Covaris S220 following 500 bp target size recommendations from the  
619 manufacturer. Fragmented DNA was purified using Qiagen PCR purification kit, eluted in 40 µl EB and  
620 quantified using the NanoDrop. Custom-made adapters were used to prepare the libraries for paired-  
621 end Illumina sequencing using ~1 µg of DNA as an input. Adapter ligation was performed for 4 hours at  
622 RT, followed by an inactivation step at 65 °C for 20 min. DNA was purified with 0.75× AMPure beads  
623 and 3 µl were used for 50 µl PCR reaction (12 cycles). Amplified libraries were purified on Qiagen  
624 columns and pair-end sequenced on an Illumina platform (HiSeq4000 or NextSeq).

#### 625 *Processing of PE reads and generation of contact maps*

626 A custom script was used to demultiplex the sequencing data. Prinseq was used to clean the  
627 data prior to processing it following the steps described at

628 [https://github.com/axelcournac/3C\\_tutorial](https://github.com/axelcournac/3C_tutorial).

629 Briefly, each mate was mapped to the reference genome (NC\_000964.3) using bowtie2 in very-  
630 sensitive-local mode. Next, data was sorted and both mates merged. The reads of  
631 mapping quality above 30 were filtered out and assigned to a restriction fragment. Uninformative  
632 events including recircularization on itself (loops), uncut fragments, and re-ligations in original  
633 orientation were discarded. Only pairs of reads corresponding to long-range interactions were used  
634 for generation of contact maps (between 5 and 8% of all reads). A bin size of 10 kb was used. Contact  
635 maps were normalized through the sequential component normalization procedure (SCN).  
636 Subsequent visualization was done using MATLAB (R2019b). To facilitate visualization of the  
637 contact maps, first the log10 and then a Gaussian filter (H = 1) were applied to smooth the image.

638

#### 639 **Live cell imaging**

640 Cells were grown in SMG to OD600 = 0.04. 2 ml culture volumes were spun down at 8000 rcf for 2  
641 minute at RT. Supernatant was removed, cells were resuspended in 10 µl PBS. 0.5 µl cell suspension

642 were spotted onto homemade agarose microscopy slides. Images were acquired using a Leica DMI8  
643 microscope with a sCMOS DFC9000 (Leica) camera, a SOLA light engine (Lumencor) and a  $\times 100/1.40$   
644 oil-immersion objective. Images were acquired with 600 ms exposure at 470 nm excitation, 520 nm  
645 emission. Images were processed using LasX v.3.3.0.16799 (Leica).

646

#### 647 **Chromatin-Immunoprecipitation coupled to quantitative PCR (ChIP-qPCR)**

648 ChIP samples were prepared as described previously (Bürmann *et al.*, 2017). Cultures were grown in  
649 200 ml volumes SMG at 37°C. Cells were grown to mid-exponential phase ( $OD_{600}=0.02-0.03$ ) and fixed  
650 by incubation for 30 minutes with 1/10 [v/v] of buffer F (50 mM Tris-HCl pH 7.4, 100 mM NaCl, 0.5  
651 mM EGTA pH 8.0, 1 mM EDTA pH 8.0, 10% [w/v] formaldehyde). Cells were harvested by filtration and  
652 washed in cold PBS.  $OD_{600}$  values of samples were normalized to 2 and resuspended in TSEMS (50  
653 mM Tris pH 7.4, 50 mM NaCl, 10 mM EDTA pH 8.0, 0.5 M sucrose and PIC (Sigma)) supplemented with  
654 6 mg/ml chicken egg white lysozyme (Sigma). Samples were incubated at 37°C for 30 minutes under  
655 shaking. Resulting protoplasts were harvested by centrifugation, washed in 2 ml TSEMS, resuspended  
656 in ml TSEMS and split into 3 aliquots of equivalent volume before pelleting and flash freezing.

657 Samples were resuspended in 2 ml of buffer L (50 mM HEPES-KOH pH 7.5, 140 mM NaCl, 1 mM EDTA  
658 pH 8.0, 1% [v/v] Triton X-100, 0.1% [w/v] Na-deoxycholate, 0.1 mg/ml RNaseA and PIC (Sigma)),  
659 transferred to 5 ml round-bottom tubes and sonicated three times for 20 seconds using a Bandelin  
660 Sonoplus with a MS72 tip (90% pulse and 35% power output). Suspensions were centrifuged for 10  
661 minutes at 21 krcf at 4°C. Samples were split into 200  $\mu$ l Input material and 800  $\mu$ l IP material.

662 Antibody serum was incubated with equivalent volumes of Dynabeads Protein G suspension  
663 (Invitrogen) for 2 hours at 4°C under gentle agitation. Beads were washed in 1 ml Buffer L directly prior  
664 to use and resuspended as 50  $\mu$ l aliquots of 30 mg/mL. IP material was mixed with these 50  $\mu$ l aliquots  
665 and incubated at 4°C for 2 hours under rotation. Bound material was subsequently washed by 1 ml  
666 washes with buffer L, L5 buffer L containing 500 mM NaCl), buffer W (10 mM Tris-HCl pH 8.0, 250 mM  
667 LiCl, 0.5% [v/v] NP-40, 0.5% [w/v] Na-Deoxycholate, 1 mM EDTA pH 8.0) and buffer TE (10 mM Tris-  
668 HCl pH 8.0, 1 mM EDTA pH 8.0). Beads were resuspended in 520  $\mu$ l TES (50 mM Tris-HCl pH 8.0, 10  
669 mM EDTA pH 8.0, 1% (w/v) SDS). Input material was supplemented with 300  $\mu$ l TES and 20  $\mu$ l 10% SDS.  
670 Tubes were incubated at 65°C over-night under vigorous shaking.

671 DNA was purified using Phenol-chloroform extraction by adding and thoroughly mixing first with  
672 500  $\mu$ l phenol equilibrated with buffer (10 mM Tris-HCl pH 8.0, 1 mM EDTA). Phases were separated  
673 by centrifugation for 10 min at 21 krcf. 450  $\mu$ l supernatant were subsequently mixed with and again  
674 separated from 450  $\mu$ l chloroform. 400  $\mu$ l supernatant were taken off, mixed with 1.2  $\mu$ l GlycoBlue  
675 (Invitrogen), 30  $\mu$ l of 3 M Na-Acetate (pH 5.2) and 1 ml ethanol (filtered). Samples were incubated at

676 -20°C for at least 30 minutes. DNA was precipitated by centrifugation at room temperature with 21  
677 krcf for 10 minutes. DNA was resuspended in 100 µL volumes PB (Qiagen) and dissolved by incubation  
678 at 55°C under vigorous shaking for 10 minutes. Samples were subsequently purified using a PCR  
679 purification kit (Qiagen) as per protocol and eluted in 50 µl elution buffer.

680 Samples were diluted to 1:10 for IP and 1:100 for Input material. Reaction for qPCR were prepared by  
681 mixing 4 µl diluted samples with 5 µl 2x 5 µl Takyon SYBR MasterMix and 1 µl qPCR primer mixture (3  
682 µ M). A list of qPCR primers in given in Supplementary Table 3. Samples were run in a Rotor-Gene Q  
683 (Qiagen) and analyzed using PCR miner (Zhao and Fernald, 2005).

684

### 685 ***In vivo* Cys-Cys and Lys-Cys cross-linking**

686 Cross-linking was performed as described in (Soh *et al.*, 2019). Cultures were grown in SMG to OD600  
687 of 0.03-0.04 at 37°C. Cells were mixed with ice and harvested by centrifugation. Samples handling and  
688 preparation was done on ice and cold at every step. Cells were washed in PBSG (PBS with 0.1% [v/v]  
689 glycerol). Samples were resuspended in 1 ml PBSG. 1.25 OD600 equivalents were taken and pelleted  
690 by centrifugation. Pellets were resuspended in 30 µl PBSG. Cross-linking agent (SMCC (Thermo) or  
691 BMOE (Thermo) were added to 0.5 mM final concentration and mixed by vortexing. Reactions were  
692 incubated on ice for 10 minutes and then quenched by addition of 0.5 mM final concentration 2-  
693 Mercaptoethanol with subsequent incubation for 2 minutes. Samples were supplemented with  
694 additives at the indicated final concentrations: Benzonase (750 U/ml; Sigma), 5 µM HaloTag-TMR  
695 ligand (Promega), Ready-Lyse Lysozyme (47 U/µl; Epicentre), and 1× PIC (Sigma-Aldrich). Samples  
696 were incubated at 37°C for 30 minutes under light protection. Samples were supplemented with LPS  
697 loading dye and denatured at 70°C for 5 minutes. Samples were run on 3-8% Tris-Acetate gels  
698 (Invitrogen) at constant power output of 35 mA at 4°C. In-gel fluorescence was imaged using an  
699 Amersham Typhoon (GE Healthcare) with a Cy3 DIGE filter. Quantification was done using ImageQuant  
700 (GE Healthcare).

701

### 702 **Structure prediction by AlphaFold-Multimer**

703 Predictions were performed using the Colab notebook ([dpmd.ai/alphafold-colab](https://colab.research.google.com/github/dpmd/alphafold-colab)) (Evans *et al.*, 2021;  
704 Jumper *et al.*, 2021). The input sequences are denoted in the figure legends.

## 705 References

- 706 Anchimiuk, A., Lioy, V.S., Bock, F.P., Minnen, A., Boccard, F., and Gruber, S. (2021). A low Smc flux  
707 avoids collisions and facilitates chromosome organization in *Bacillus subtilis*. *Elife* *10*.  
708 10.7554/eLife.65467.
- 709 Antar, H., Soh, Y.M., Zamuner, S., Bock, F.P., Anchimiuk, A., Rios, P.L., and Gruber, S. (2021). Relief of  
710 ParB autoinhibition by parS DNA catalysis and recycling of ParB by CTP hydrolysis promote bacterial  
711 centromere assembly. *Sci Adv* *7*, eabj2854. 10.1126/sciadv.abj2854.
- 712 Brandão, H.B., Ren, Z., Karaboja, X., Mirny, L.A., and Wang, X. (2021). DNA-loop-extruding SMC  
713 complexes can traverse one another in vivo. *Nature Structural & Molecular Biology* *28*, 642-651.  
714 10.1038/s41594-021-00626-1.
- 715 Bürmann, F., Basfeld, A., Vazquez Nunez, R., Diebold-Durand, M.L., Wilhelm, L., and Gruber, S. (2017).  
716 Tuned SMC Arms Drive Chromosomal Loading of Prokaryotic Condensin. *Mol Cell* *65*, 861-872 e869.  
717 10.1016/j.molcel.2017.01.026.
- 718 Bürmann, F., Funke, L.F.H., Chin, J.W., and Löwe, J. (2021). Cryo-EM structure of MukBEF reveals DNA  
719 loop entrapment at chromosomal unloading sites. *Molecular Cell*.  
720 <https://doi.org/10.1016/j.molcel.2021.10.011>.
- 721 Bürmann, F., and Gruber, S. (2015). SMC condensin: promoting cohesion of replicon arms. *Nat Struct*  
722 *Mol Biol* *22*, 653-655. 10.1038/nsmb.3082.
- 723 Bürmann, F., Shin, H.C., Basquin, J., Soh, Y.M., Gimenez-Oya, V., Kim, Y.G., Oh, B.H., and Gruber, S.  
724 (2013). An asymmetric SMC-kleisin bridge in prokaryotic condensin. *Nat Struct Mol Biol* *20*, 371-379.  
725 10.1038/nsmb.2488.
- 726 Chen, B.-W., Lin, M.-H., Chu, C.-H., Hsu, C.-E., and Sun, Y.-J. (2015). Insights into ParB spreading from  
727 the complex structure of Spo0J and *parS*. *Proceedings of the National Academy of*  
728 *Sciences* *112*, 6613-6618. 10.1073/pnas.1421927112.
- 729 Collier, J.E., Lee, B.G., Roig, M.B., Yatskevich, S., Petela, N.J., Metson, J., Voulgaris, M., Gonzalez  
730 Llamazares, A., Lowe, J., and Nasmyth, K.A. (2020). Transport of DNA within cohesin involves clamping  
731 on top of engaged heads by Scc2 and entrapment within the ring by Scc3. *Elife* *9*. 10.7554/eLife.59560.
- 732 Davidson, I.F., Bauer, B., Goetz, D., Tang, W., Wutz, G., and Peters, J.M. (2019). DNA loop extrusion by  
733 human cohesin. *Science* *366*, 1338-1345. 10.1126/science.aaz3418.
- 734 Diebold-Durand, M.L., Burmann, F., and Gruber, S. (2019). High-Throughput Allelic Replacement  
735 Screening in *Bacillus subtilis*. *Methods Mol Biol* *2004*, 49-61. 10.1007/978-1-4939-9520-2\_5.
- 736 Diebold-Durand, M.L., Lee, H., Ruiz Avila, L.B., Noh, H., Shin, H.C., Im, H., Bock, F.P., Bürmann, F.,  
737 Durand, A., Basfeld, A., et al. (2017). Structure of Full-Length SMC and Rearrangements Required for  
738 Chromosome Organization. *Mol Cell* *67*, 334-347 e335. 10.1016/j.molcel.2017.06.010.
- 739 Evans, R., O'Neill, M., Pritzel, A., Antropova, N., Senior, A., Green, T., Židek, A., Bates, R., Blackwell, S.,  
740 Yim, J., et al. (2021). Protein complex prediction with AlphaFold-Multimer. *bioRxiv*,  
741 2021.2010.2004.463034. 10.1101/2021.10.04.463034.
- 742 Feng, Z., Chen, X., Wu, X., and Zhang, M. (2019). Formation of biological condensates via phase  
743 separation: Characteristics, analytical methods, and physiological implications. *J Biol Chem* *294*,  
744 14823-14835. <https://doi.org/10.1074/jbc.REV119.007895>.
- 745 Fisher, G.L., Pastrana, C.L., Higman, V.A., Koh, A., Taylor, J.A., Butterer, A., Craggs, T., Sobott, F.,  
746 Murray, H., Crump, M.P., et al. (2017). The structural basis for dynamic DNA binding and bridging  
747 interactions which condense the bacterial centromere. *Elife* *6*. 10.7554/eLife.28086.
- 748 Glaser, P., Sharpe, M.E., Raether, B., Perego, M., Ohlsen, K., and Errington, J. (1997). Dynamic, mitotic-  
749 like behavior of a bacterial protein required for accurate chromosome partitioning. *Genes &  
750 development* *11*, 1160-1168. 10.1101/gad.11.9.1160.
- 751 Gligoris, T.G., Scheinost, J.C., Burmann, F., Petela, N., Chan, K.L., Uluocak, P., Beckouet, F., Gruber, S.,  
752 Nasmyth, K., and Lowe, J. (2014). Closing the cohesin ring: structure and function of its Smc3-kleisin  
753 interface. *Science* *346*, 963-967. 10.1126/science.1256917.

- 754 Gruber, S., and Errington, J. (2009). Recruitment of condensin to replication origin regions by  
755 ParB/SpoOJ promotes chromosome segregation in *B. subtilis*. *Cell* *137*, 685-696.  
756 10.1016/j.cell.2009.02.035.
- 757 Gruber, S., Veening, J.W., Bach, J., Blettinger, M., Bramkamp, M., and Errington, J. (2014). Interlinked  
758 sister chromosomes arise in the absence of condensin during fast replication in *B. subtilis*. *Curr Biol*  
759 *24*, 293-298. 10.1016/j.cub.2013.12.049.
- 760 Guilhas, B., Walter, J.C., Rech, J., David, G., Walliser, N.O., Palmeri, J., Mathieu-Demaziere, C.,  
761 Parmeggiani, A., Bouet, J.Y., Le Gall, A., and Nollmann, M. (2020). ATP-Driven Separation of Liquid  
762 Phase Condensates in Bacteria. *Mol Cell* *79*, 293-303 e294. 10.1016/j.molcel.2020.06.034.
- 763 Haering, C.H., Löwe, J., Hochwagen, A., and Nasmyth, K. (2002). Molecular Architecture of SMC  
764 Proteins and the Yeast Cohesin Complex. *Molecular Cell* *9*, 773-788. 10.1016/s1097-2765(02)00515-  
765 4.
- 766 Higashi, T.L., Eickhoff, P., Sousa, J.S., Locke, J., Nans, A., Flynn, H.R., Snijders, A.P., Papageorgiou, G.,  
767 O'Reilly, N., Chen, Z.A., et al. (2020). A Structure-Based Mechanism for DNA Entry into the Cohesin  
768 Ring. *Mol Cell* *79*, 917-933 e919. <https://doi.org/10.1016/j.molcel.2020.07.013>.
- 769 Hirano, M., and Hirano, T. (2002). Hinge-mediated dimerization of SMC protein is essential for its  
770 dynamic interaction with DNA. *EMBO J* *21*, 5733-5744. 10.1093/emboj/cdf575.
- 771 Hwang, L.C., Vecchiarelli, A.G., Han, Y.W., Mizuuchi, M., Harada, Y., Funnell, B.E., and Mizuuchi, K.  
772 (2013). ParA-mediated plasmid partition driven by protein pattern self-organization. *EMBO J* *32*, 1238-  
773 1249. 10.1038/emboj.2013.34.
- 774 Jalal, A.S.B., Tran, N.T., Wu, L.J., Ramakrishnan, K., Rejzek, M., Gobbato, G., Stevenson, C.E.M., Lawson,  
775 D.M., Errington, J., and Le, T.B.K. (2021). CTP regulates membrane-binding activity of the nucleoid  
776 occlusion protein Noc. *Mol Cell* *81*, 3623-3636.e3626. 10.1016/j.molcel.2021.06.025.
- 777 Josh, P., Jani, B., Gemma, F., Jarno, M., Majorie, F., Carol, R., Lidia, A., and David, S. (2021). Acyl Carrier  
778 Protein is essential for MukBEF action in *Escherichia coli* chromosome organization-segregation.  
779 *Nature Portfolio*. 10.21203/rs.3.rs-547787/v1.
- 780 Jumper, J., Evans, R., Pritzel, A., Green, T., Figurnov, M., Ronneberger, O., Tunyasuvunakool, K., Bates,  
781 R., Žídek, A., Potapenko, A., et al. (2021). Highly accurate protein structure prediction with AlphaFold.  
782 *Nature* *596*, 583-589. 10.1038/s41586-021-03819-2.
- 783 Käshammer, L., Saathoff, J.-H., Lammens, K., Gut, F., Bartho, J., Alt, A., Kessler, B., and Hopfner, K.-P.  
784 (2019). Mechanism of DNA End Sensing and Processing by the Mre11-Rad50 Complex. *Molecular Cell*  
785 *76*, 382-394.e386. 10.1016/j.molcel.2019.07.035.
- 786 Kjos, M., and Veening, J.-W. (2014). Tracking of chromosome dynamics in live *Streptococcus*  
787 *pneumoniae* reveals that transcription promotes chromosome segregation. *Molecular Microbiology*  
788 *91*, 1088-1105. 10.1111/mmi.12517.
- 789 Lee, B.-G., Rhodes, J., and Löwe, J. (2021). Clamping of DNA shuts the condensin neck gate. *bioRxiv*,  
790 2021.2010.2029.466484. 10.1101/2021.10.29.466484.
- 791 Leonard, T.A., Butler, P.J., and Löwe, J. (2005). Bacterial chromosome segregation: structure and DNA  
792 binding of the Soj dimer ? a conserved biological switch. *The EMBO Journal* *24*, 270-282.  
793 10.1038/sj.emboj.7600530.
- 794 Lim, H.C., Surovtsev, I.V., Beltran, B.G., Huang, F., Bewersdorf, J., and Jacobs-Wagner, C. (2014).  
795 Evidence for a DNA-relay mechanism in ParABS-mediated chromosome segregation. *Elife* *3*, e02758.  
796 10.7554/eLife.02758.
- 797 Lioy, V.S., Cournac, A., Marbouty, M., Duigou, S., Mozziconacci, J., Espéli, O., Bocard, F., and Koszul,  
798 R. (2018). Multiscale Structuring of the *E. coli* Chromosome by Nucleoid-Associated and Condensin  
799 Proteins. *Cell* *172*, 771-783.e718. <https://doi.org/10.1016/j.cell.2017.12.027>.
- 800 Marko, J.F., De Los Rios, P., Barducci, A., and Gruber, S. (2019). DNA-segment-capture model for loop  
801 extrusion by structural maintenance of chromosome (SMC) protein complexes. *Nucleic Acids Res* *47*,  
802 6956-6972. 10.1093/nar/gkz497.



803 Minnen, A., Attaiech, L., Thon, M., Gruber, S., and Veening, J.W. (2011). SMC is recruited to oriC by  
804 ParB and promotes chromosome segregation in *Streptococcus pneumoniae*. *Mol Microbiol* *81*, 676-  
805 688. 10.1111/j.1365-2958.2011.07722.x.

806 Minnen, A., Burmann, F., Wilhelm, L., Anchimiuk, A., Diebold-Durand, M.L., and Gruber, S. (2016).  
807 Control of SMC Coiled Coil Architecture by the ATPase Heads Facilitates Targeting to Chromosomal  
808 ParB/parS and Release onto Flanking DNA. *Cell Rep* *14*, 2003-2016. 10.1016/j.celrep.2016.01.066.

809 Murray, H., and Errington, J. (2008). Dynamic control of the DNA replication initiation protein DnaA by  
810 Soj/ParA. *Cell* *135*, 74-84. 10.1016/j.cell.2008.07.044.

811 Nomidis, S.K., Carlon, E., Gruber, S., and Marko, J.F. (2021). DNA tension-modulated translocation and  
812 loop extrusion by SMC complexes revealed by molecular dynamics simulations. *bioRxiv*,  
813 2021.2003.2015.435506. 10.1101/2021.03.15.435506.

814 Osorio-Valeriano, M., Altegoer, F., Das, C.K., Steinchen, W., Panis, G., Connolley, L., Giacomelli, G.,  
815 Feddersen, H., Corrales-Guerrero, L., Giammarinaro, P.I., et al. (2021). The CTPase activity of ParB  
816 determines the size and dynamics of prokaryotic DNA partition complexes. *Mol Cell* *81*, 3992-4007  
817 e3910. 10.1016/j.molcel.2021.09.004.

818 Palecek, J.J., and Gruber, S. (2015). Kite Proteins: a Superfamily of SMC/Kleisin Partners Conserved  
819 Across Bacteria, Archaea, and Eukaryotes. *Structure* *23*, 2183-2190. 10.1016/j.str.2015.10.004

820 Panas, M.W., Jain, P., Yang, H., Mitra, S., Biswas, D., Wattam, A.R., Letvin, N.L., and Jacobs, W.R., Jr.  
821 (2014). Noncanonical SMC protein in *Mycobacterium smegmatis* restricts maintenance of  
822 *Mycobacterium fortuitum* plasmids. *Proc Natl Acad Sci U S A* *111*, 13264-13271.  
823 10.1073/pnas.1414207111

824 Petrushenko, Z.M., She, W., and Rybenkov, V.V. (2011). A new family of bacterial condensins.  
825 *Molecular microbiology* *81*, 881-896. 10.1111/j.1365-2958.2011.07763.x.

826 Quisel, J.D., and Grossman, A.D. (2000). Control of sporulation gene expression in *Bacillus subtilis* by  
827 the chromosome partitioning proteins Soj (ParA) and Spo0J (ParB). *J Bacteriol* *182*, 3446-3451.  
828 10.1128/JB.182.12.3446-3451.2000.

829 Scholefield, G., Whiting, R., Errington, J., and Murray, H. (2011). Spo0J regulates the oligomeric state  
830 of Soj to trigger its switch from an activator to an inhibitor of DNA replication initiation. *Mol Microbiol*  
831 *79*, 1089-1100. 10.1111/j.1365-2958.2010.07507.x.

832 Schumacher, M.A., and Funnell, B.E. (2005). Structures of ParB bound to DNA reveal mechanism of  
833 partition complex formation. *Nature* *438*, 516-519. 10.1038/nature04149.

834 Shaltiel, I.A., Datta, S., Lecomte, L., Hassler, M., Kschonsak, M., Bravo, S., Stober, C., Eustermann, S.,  
835 and Haering, C.H. (2021). A hold-and-feed mechanism drives directional DNA loop extrusion by  
836 condensin. *bioRxiv*, 2021.2010.2029.466147. 10.1101/2021.10.29.466147.

837 Shi, Z., Gao, H., Bai, X.C., and Yu, H. (2020). Cryo-EM structure of the human cohesin-NIPBL-DNA  
838 complex. *Science* *368*, 1454-1459. DOI: 10.1126/science.abb0981.

839 Soh, Y.M., Davidson, I.F., Zamuner, S., Basquin, J., Bock, F.P., Taschner, M., Veening, J.W., De Los Rios,  
840 P., Peters, J.M., and Gruber, S. (2019). Self-organization of parS centromeres by the ParB CTP  
841 hydrolase. *Science* *366*, 1129-1133. 10.1126/science.aay3965.

842 Sullivan, N.L., Marquis, K.A., and Rudner, D.Z. (2009). Recruitment of SMC by ParB-parS organizes the  
843 origin region and promotes efficient chromosome segregation. *Cell* *137*, 697-707.  
844 10.1016/j.cell.2009.04.044.

845 Surtees, J.A., and Funnell, B.E. (2001). The DNA binding domains of P1 ParB and the architecture of  
846 the P1 plasmid partition complex. *J Biol Chem* *276*, 12385-12394. 10.1074/jbc.M009370200.

847 Tišma, M., Panoukidou, M., Antar, H., Soh, Y.-M., Barth, R., Pradhan, B., van der Torre, J., Michieletto,  
848 D., Gruber, S., and Dekker, C. (2021). *ParS*-independent recruitment of the bacterial  
849 chromosome-partitioning protein ParB. *bioRxiv*, 2021.2011.2002.466941.  
850 10.1101/2021.11.02.466941.

851 Tran, N.T., Laub, M.T., and Le, T.B.K. (2017). SMC Progressively Aligns Chromosomal Arms in  
852 *Caulobacter crescentus* but Is Antagonized by Convergent Transcription. *Cell Rep* *20*, 2057-2071.  
853 10.1016/j.celrep.2017.08.026.

- 854 Vazquez Nunez, R., Polyhach, Y., Soh, Y.M., Jeschke, G., and Gruber, S. (2021). Gradual opening of Smc  
855 arms in prokaryotic condensin. *Cell Rep* 35, 109051. [10.1016/j.celrep.2021.109051](https://doi.org/10.1016/j.celrep.2021.109051).
- 856 Vazquez Nunez, R., Ruiz Avila, L.B., and Gruber, S. (2019). Transient DNA Occupancy of the SMC  
857 Interarm Space in Prokaryotic Condensin. *Mol Cell* 75, 209-223 e206. [10.1016/j.molcel.2019.05.001](https://doi.org/10.1016/j.molcel.2019.05.001).
- 858 Wang, X., Brandao, H.B., Le, T.B., Laub, M.T., and Rudner, D.Z. (2017). *Bacillus subtilis* SMC complexes  
859 juxtapose chromosome arms as they travel from origin to terminus. *Science* 355, 524-527.  
860 [10.1126/science.aai8982](https://doi.org/10.1126/science.aai8982).
- 861 Wells, J.N., Gligoris, T.G., Nasmyth, K.A., and Marsh, J.A. (2017). Evolution of condensin and cohesin  
862 complexes driven by replacement of Kite by Hawk proteins. *Curr Biol* 27, R17-R18.  
863 [10.1016/j.cub.2016.11.050](https://doi.org/10.1016/j.cub.2016.11.050).
- 864 Wilhelm, L., Burmann, F., Minnen, A., Shin, H.C., Toseland, C.P., Oh, B.H., and Gruber, S. (2015). SMC  
865 condensin entraps chromosomal DNA by an ATP hydrolysis dependent loading mechanism in *Bacillus*  
866 *subtilis*. *Elife* 4. [10.7554/eLife.06659](https://doi.org/10.7554/eLife.06659).
- 867 Yatskevich, S., Rhodes, J., and Nasmyth, K. (2019). Organization of Chromosomal DNA by SMC  
868 Complexes. *Annu Rev Genet* 53, 445-482. [10.1146/annurev-genet-112618-043633](https://doi.org/10.1146/annurev-genet-112618-043633).
- 869 Yoshinaga, M., and Inagaki, Y. (2021). Assessing the ubiquity and origins of structural maintenance of  
870 chromosomes (SMC) proteins in eukaryotes. Cold Spring Harbor Laboratory.
- 871 Zhang, H., and Schumacher, M.A. (2017). Structures of partition protein ParA with nonspecific DNA  
872 and ParB effector reveal molecular insights into principles governing Walker-box DNA segregation.  
873 *Genes Dev* 31, 481-492. [10.1101/gad.296319.117](https://doi.org/10.1101/gad.296319.117).
- 874 Zhao, S., and Fernald, R.D. (2005). Comprehensive algorithm for quantitative real-time polymerase  
875 chain reaction. *J Comput Biol* 12, 1047-1064. [10.1089/cmb.2005.12.1047](https://doi.org/10.1089/cmb.2005.12.1047).

876



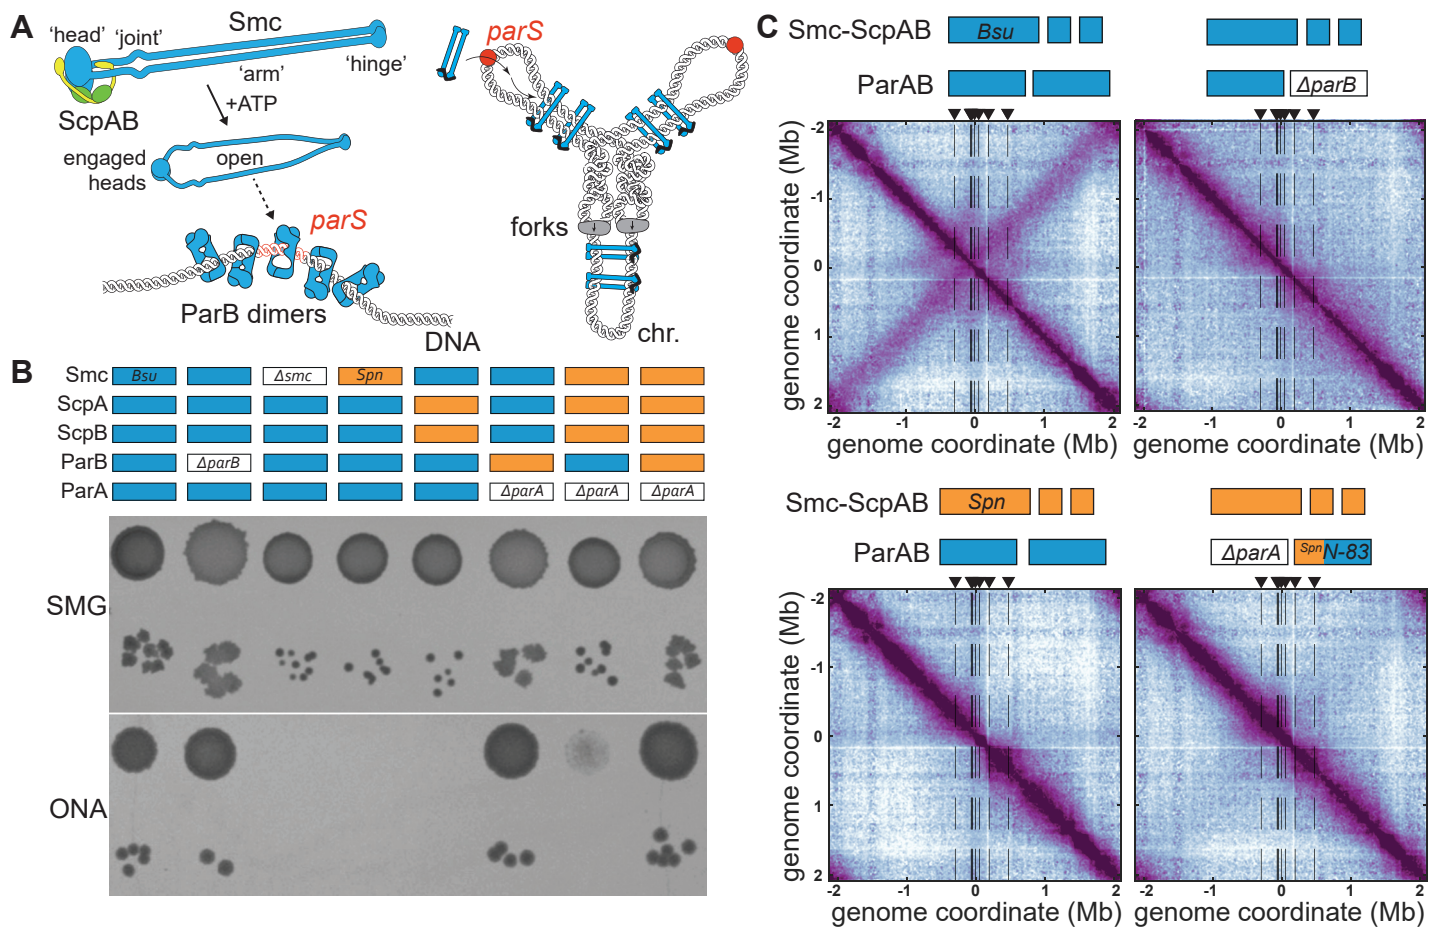

Figure 1

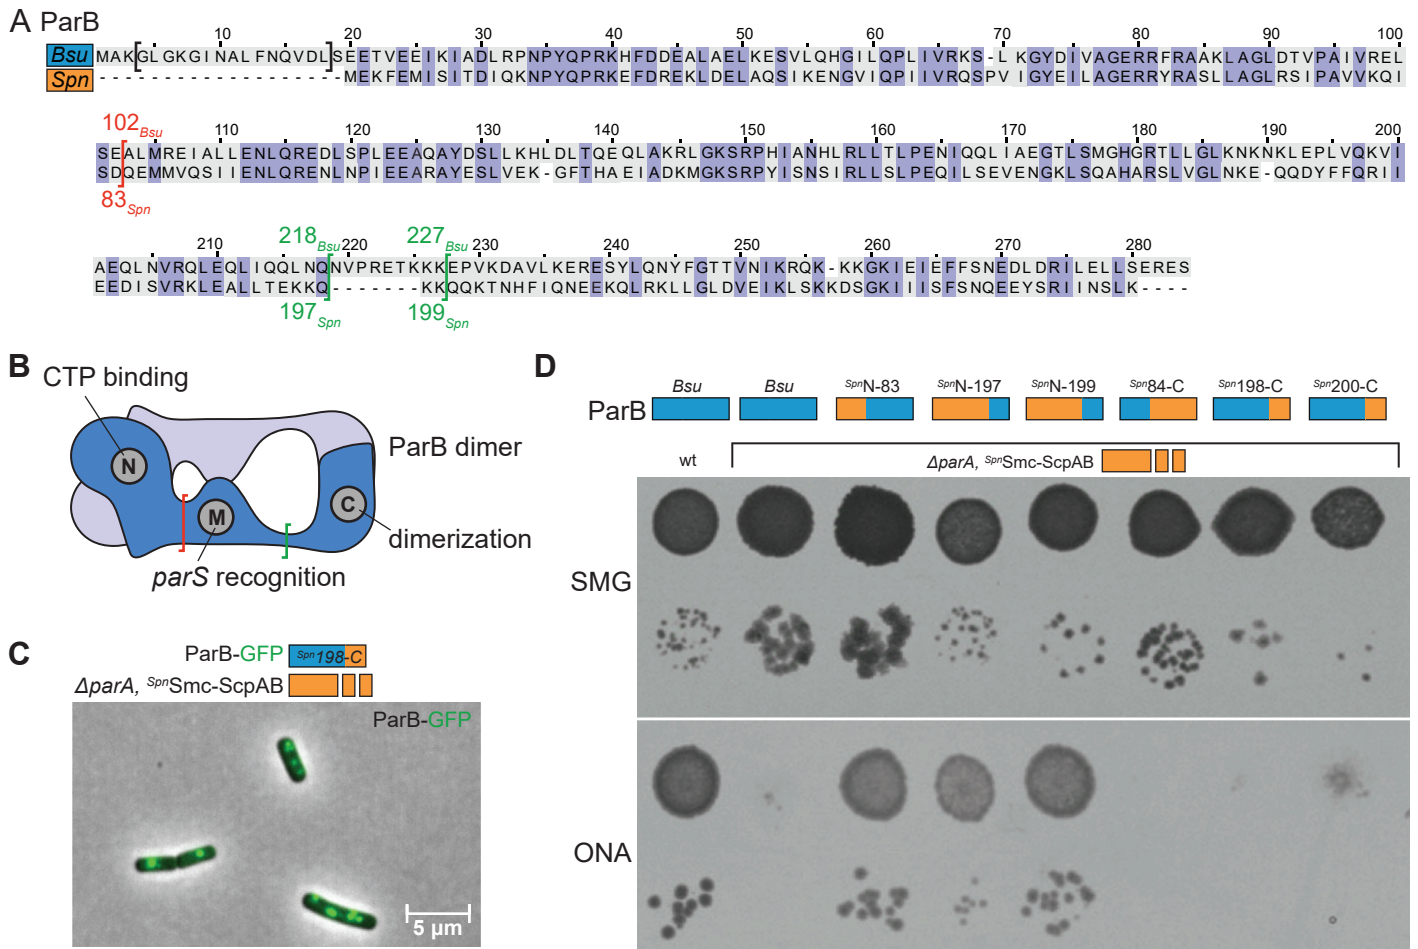

Figure 2

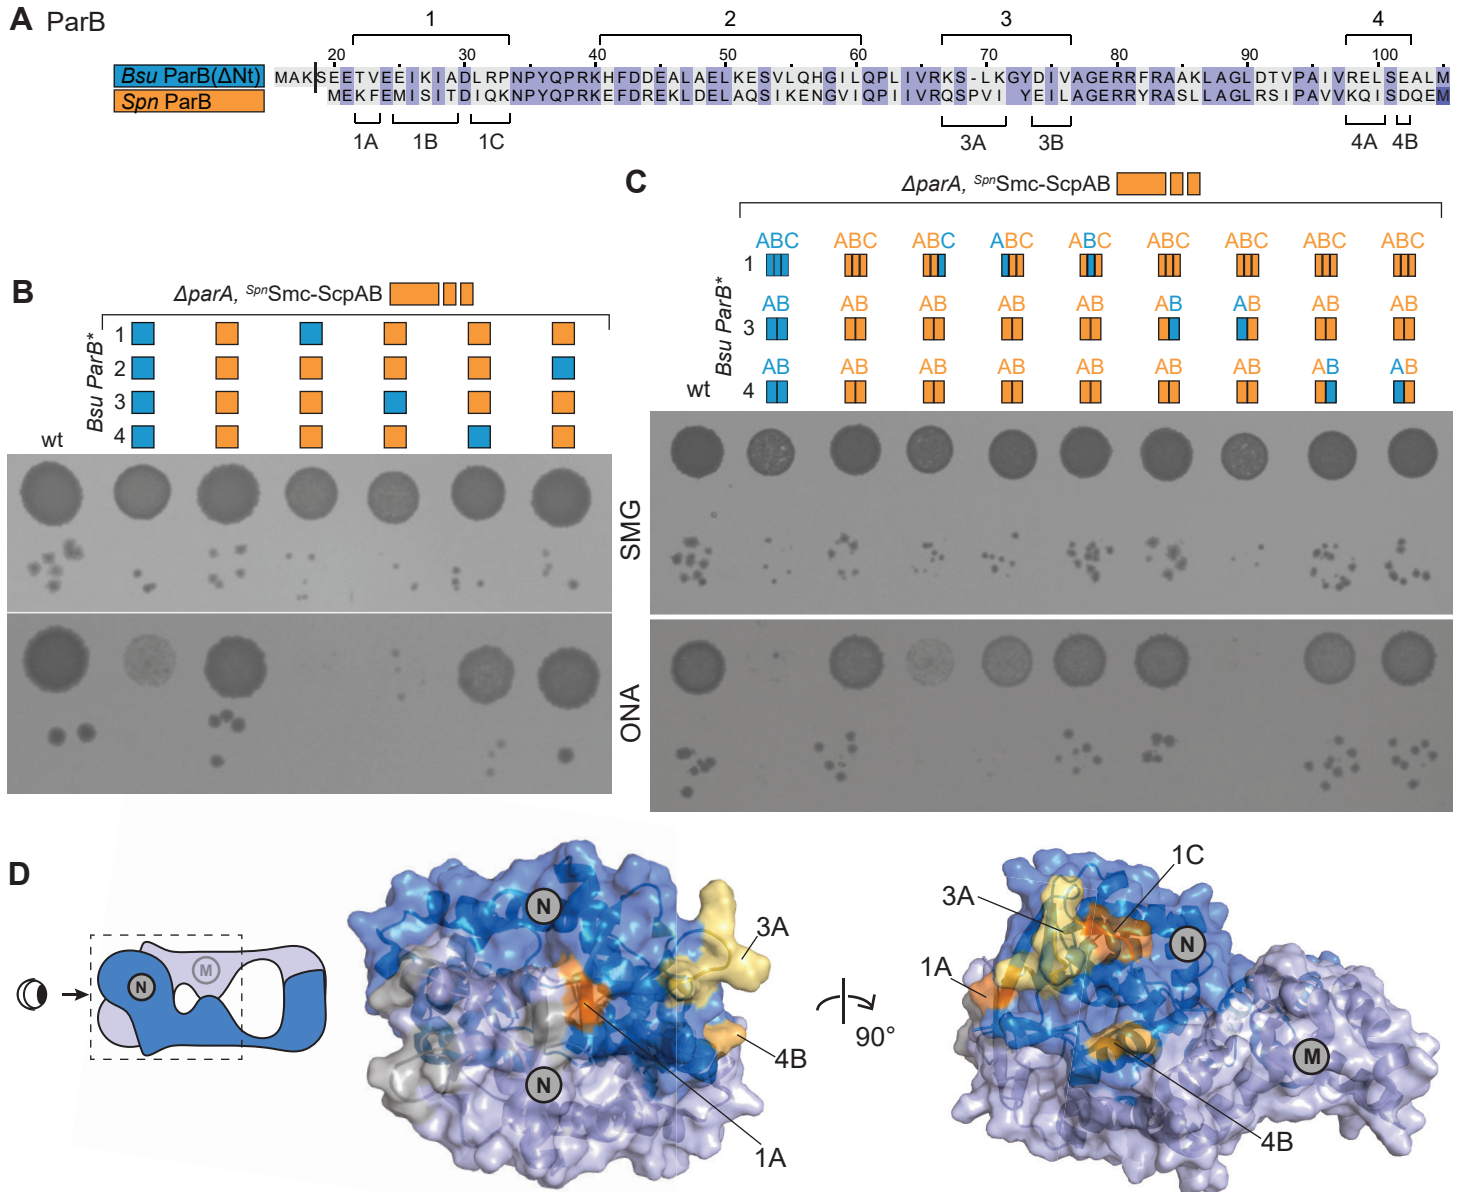

Figure 3

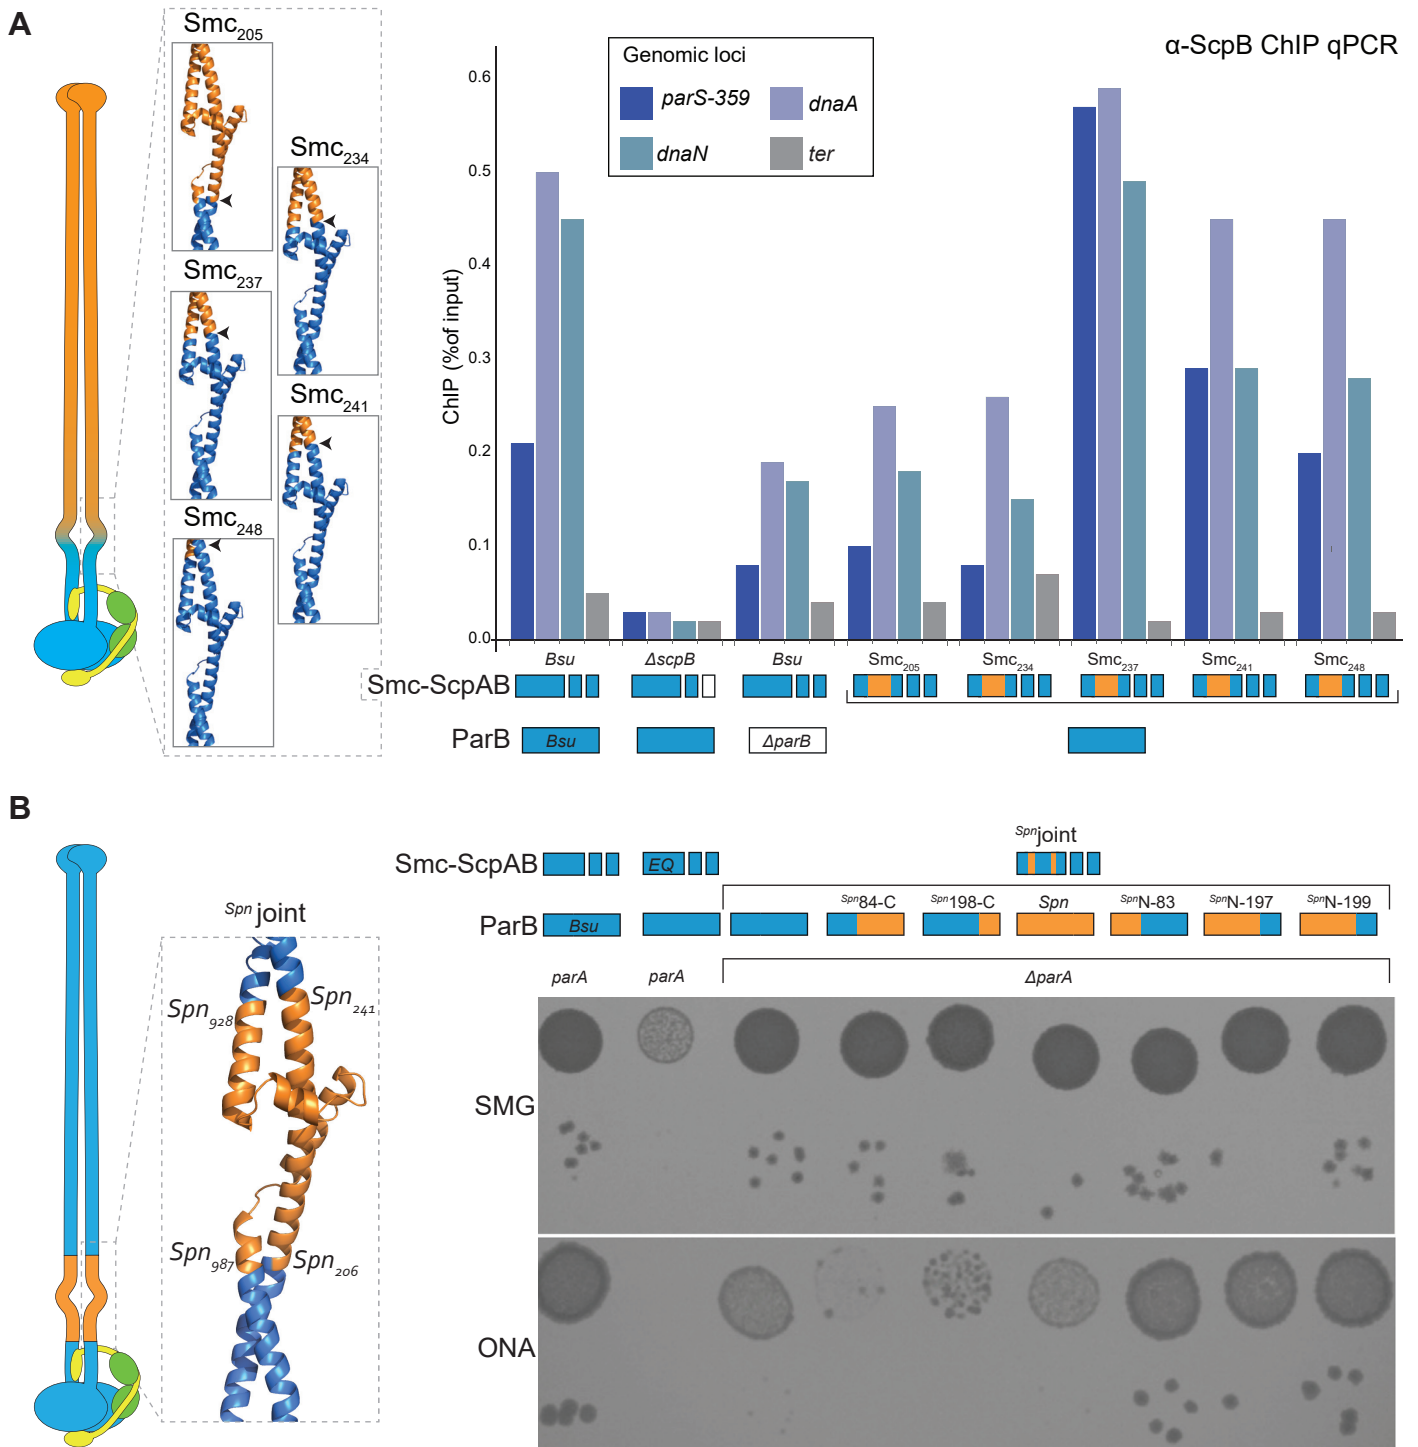

Figure 4



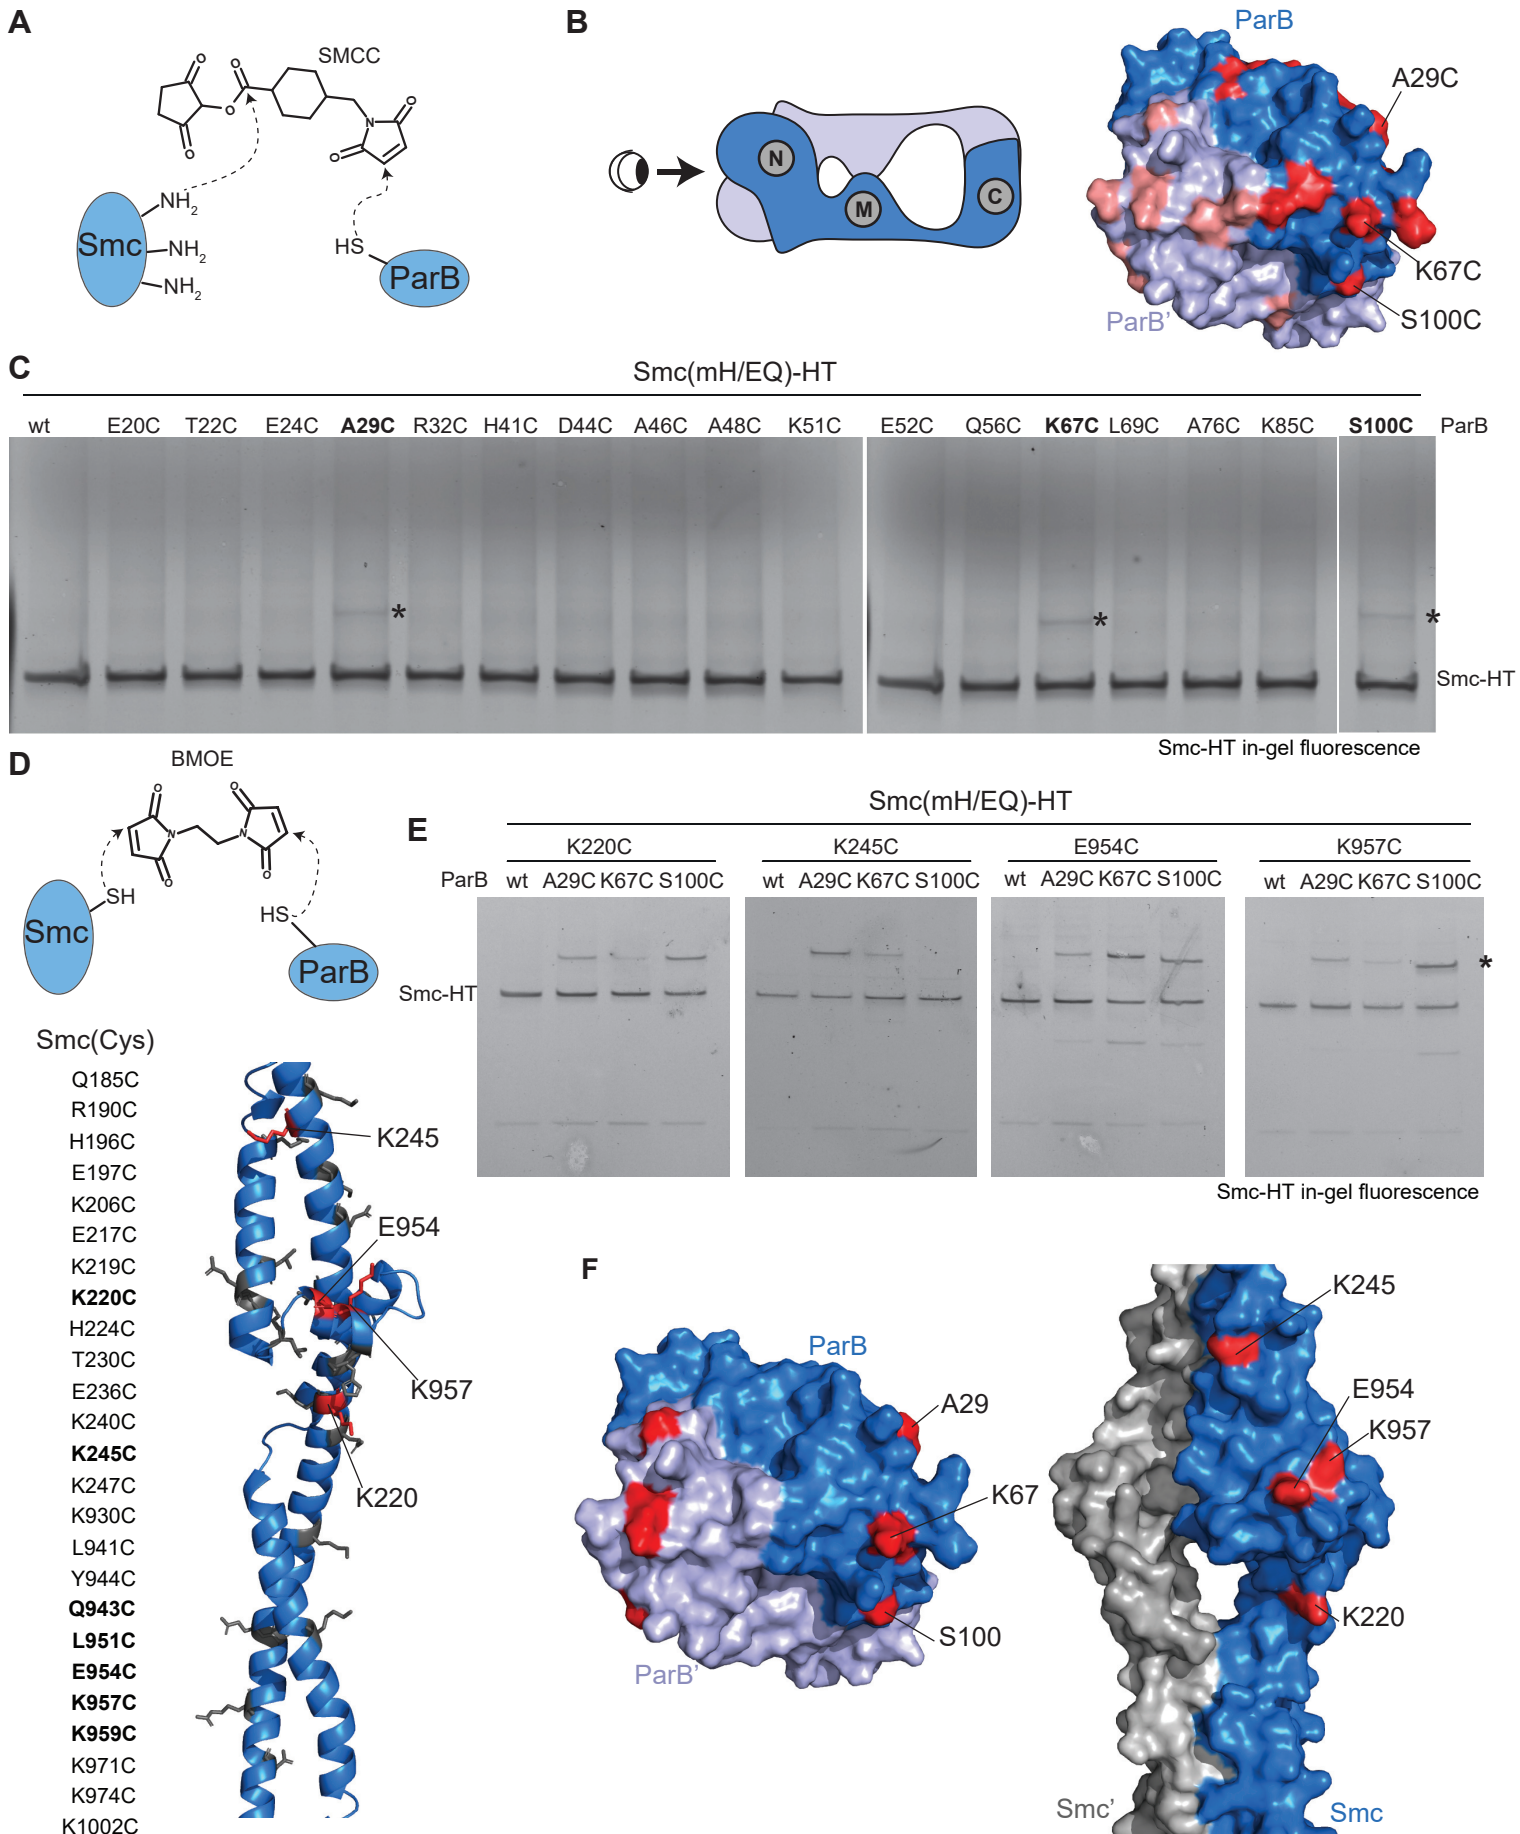

Figure 5

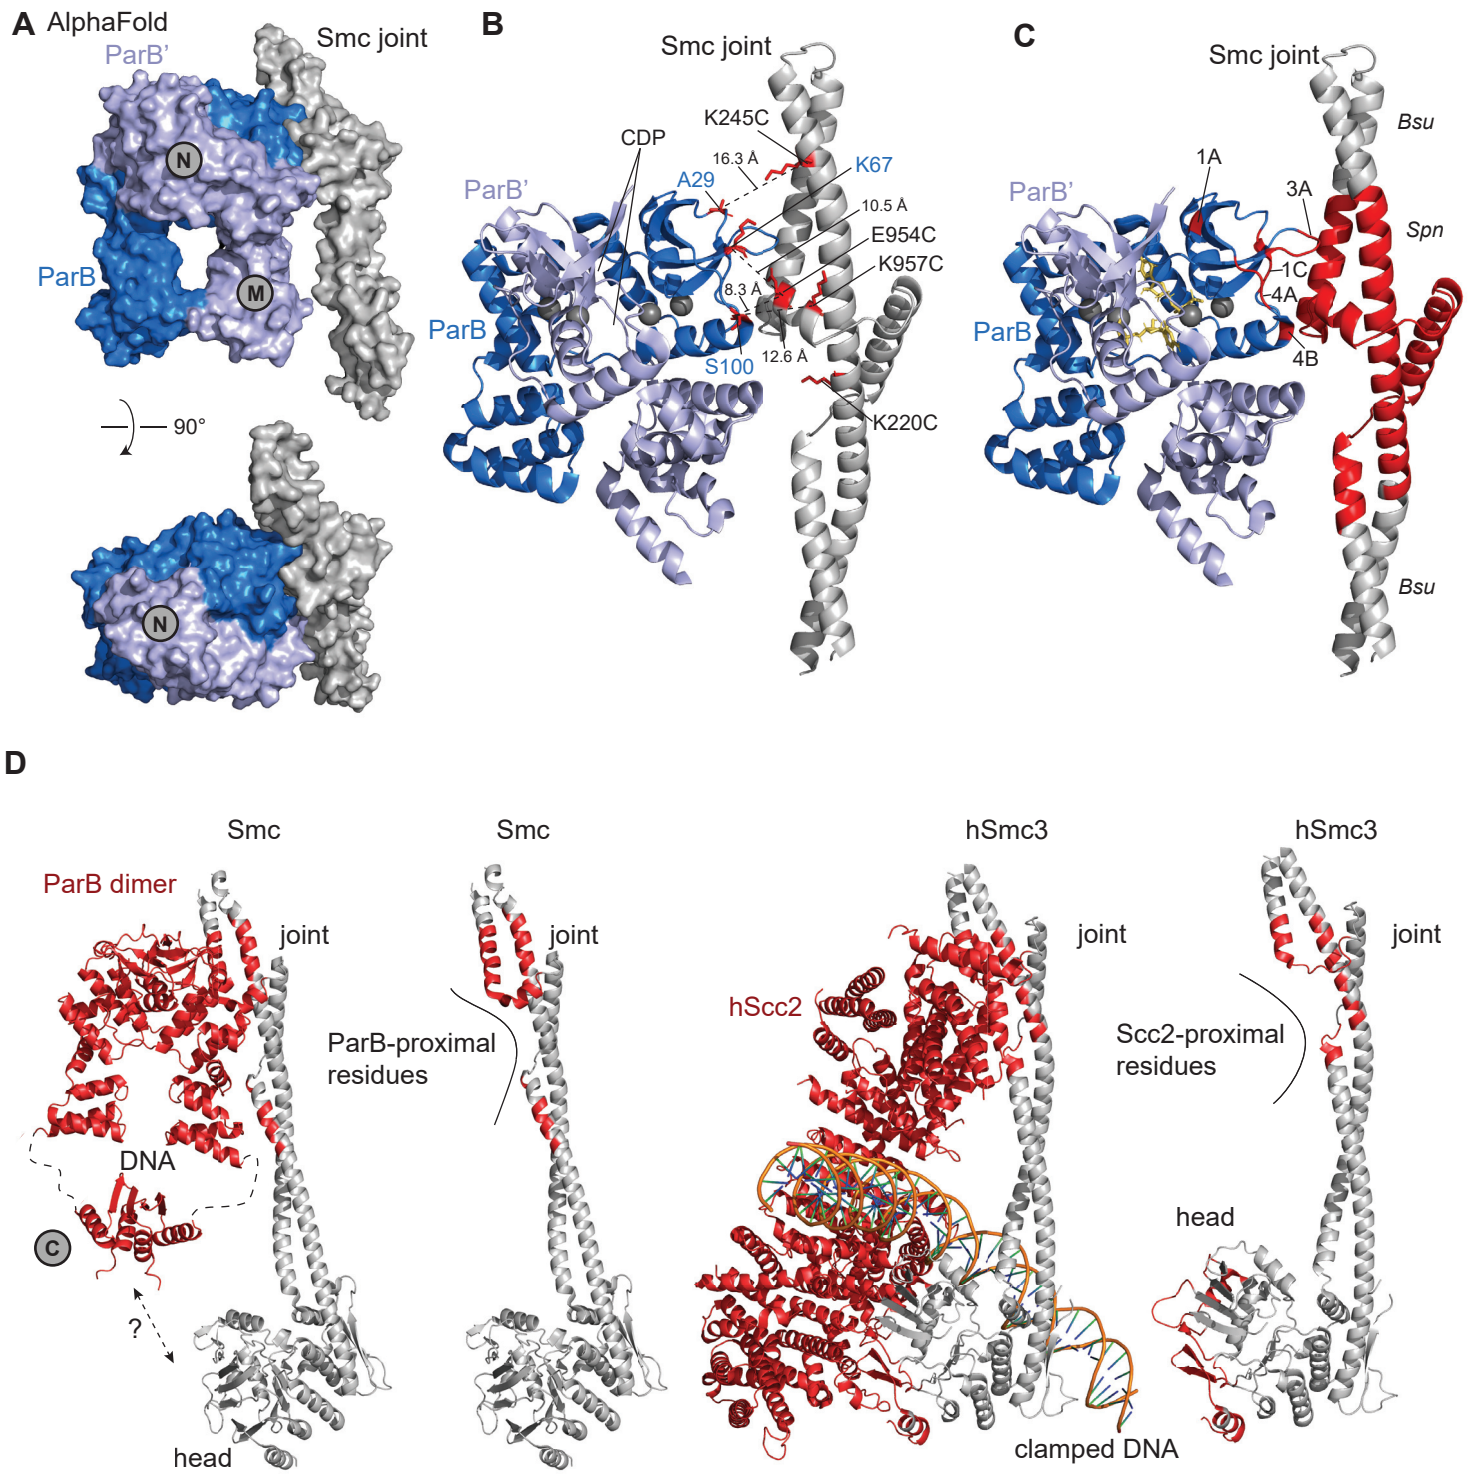

Figure 6

**A**

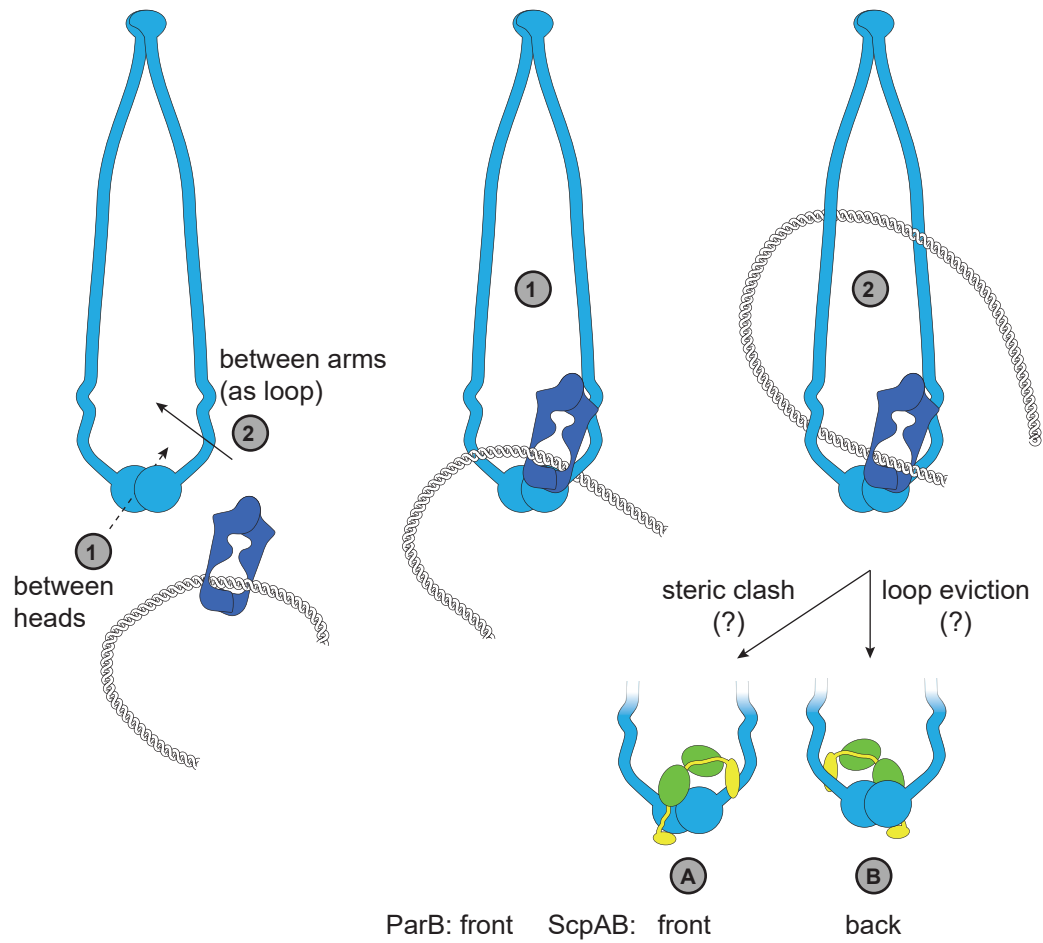

**B** Low-confidence prediction of head-ParB interfaces

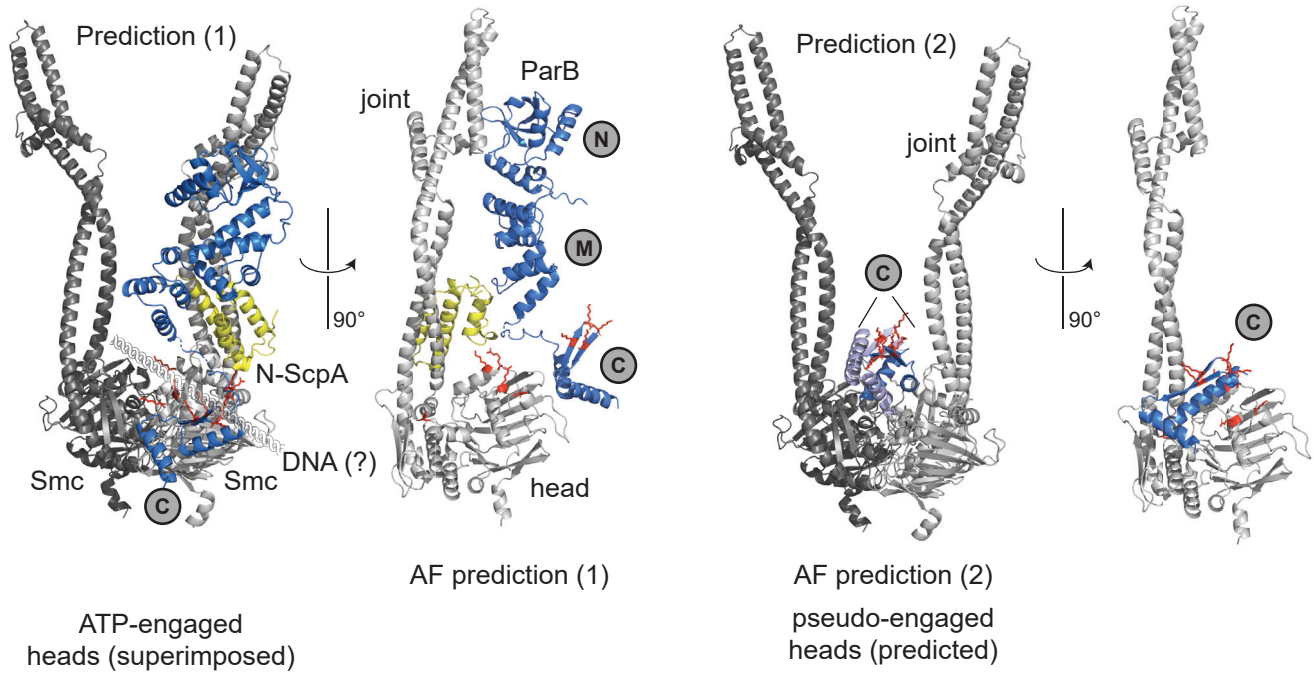

Figure 7



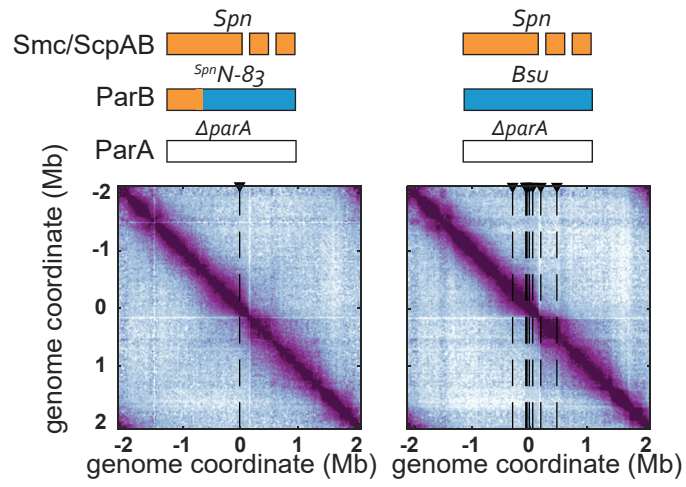

Supplementary Figure 1



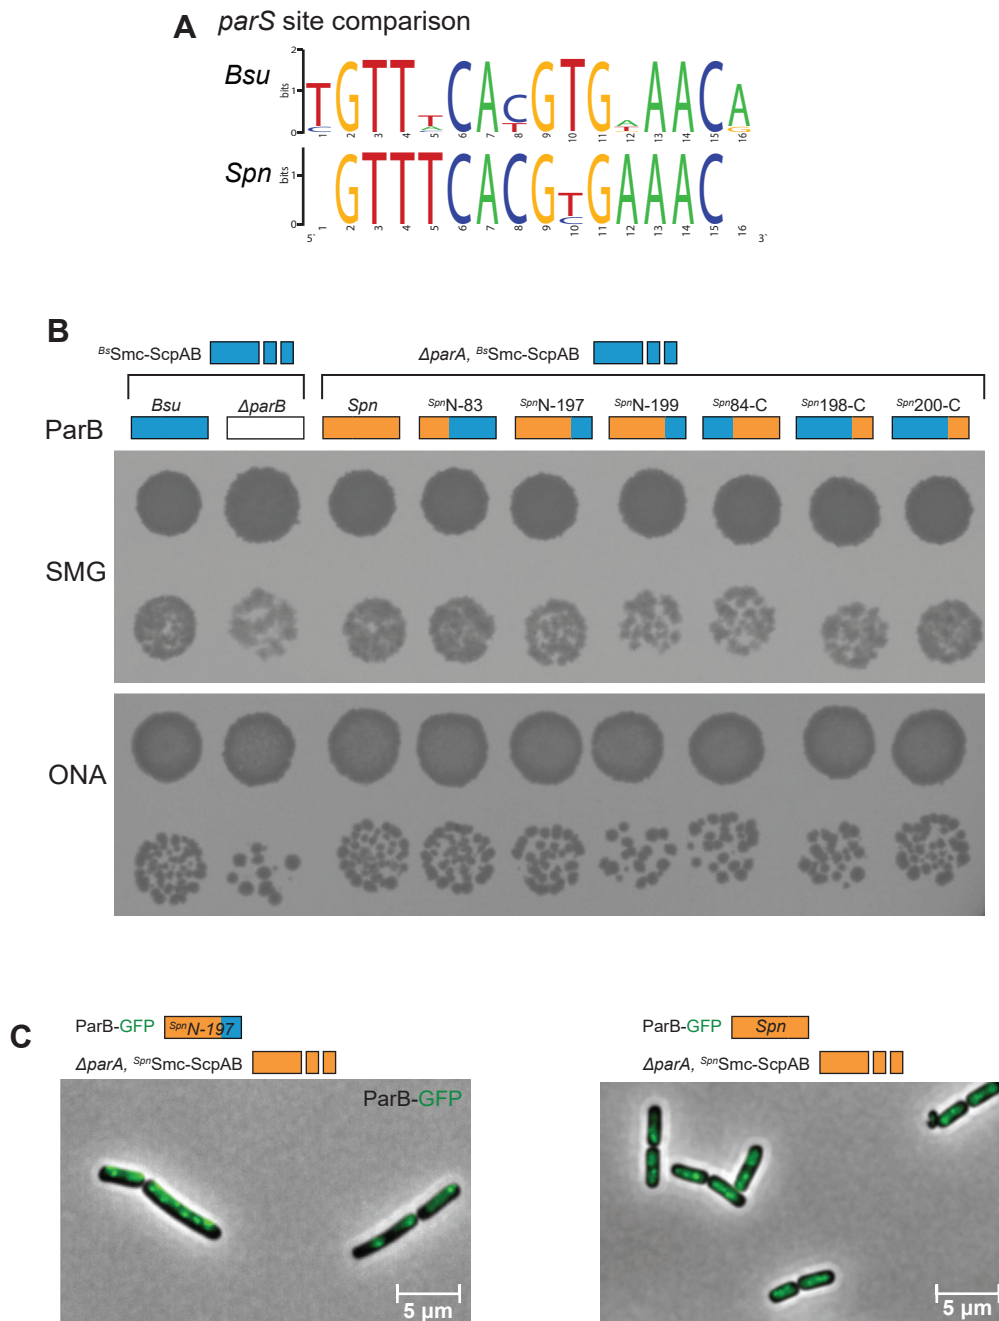

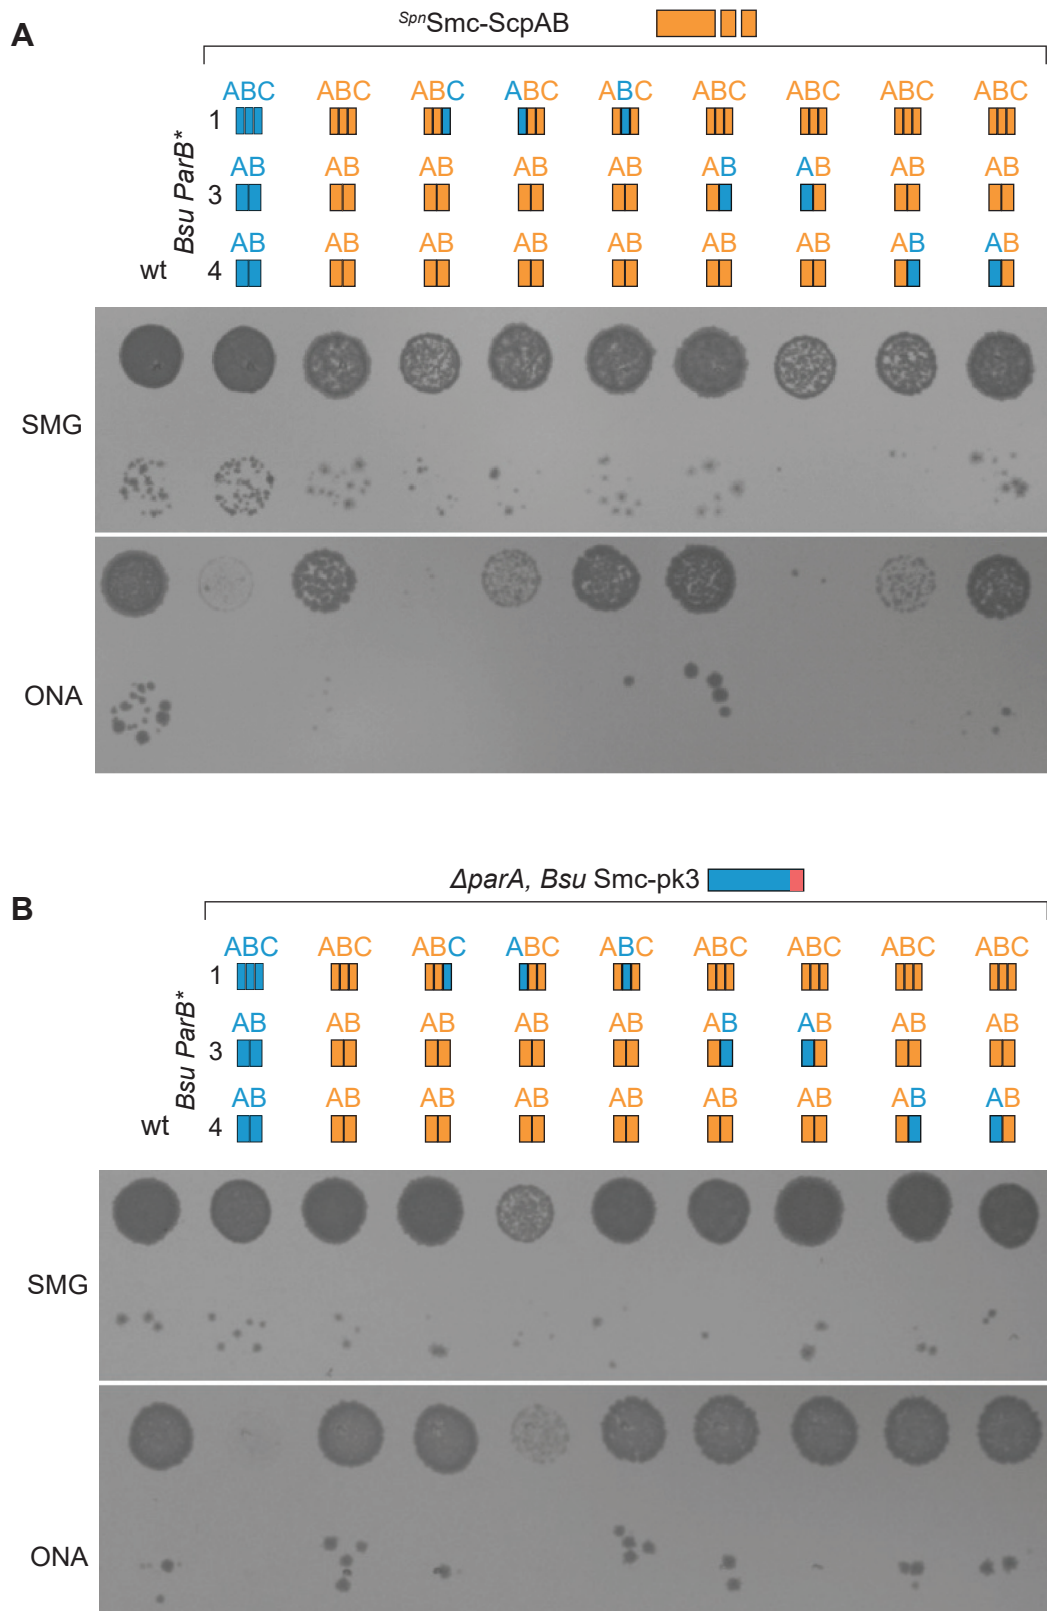

A

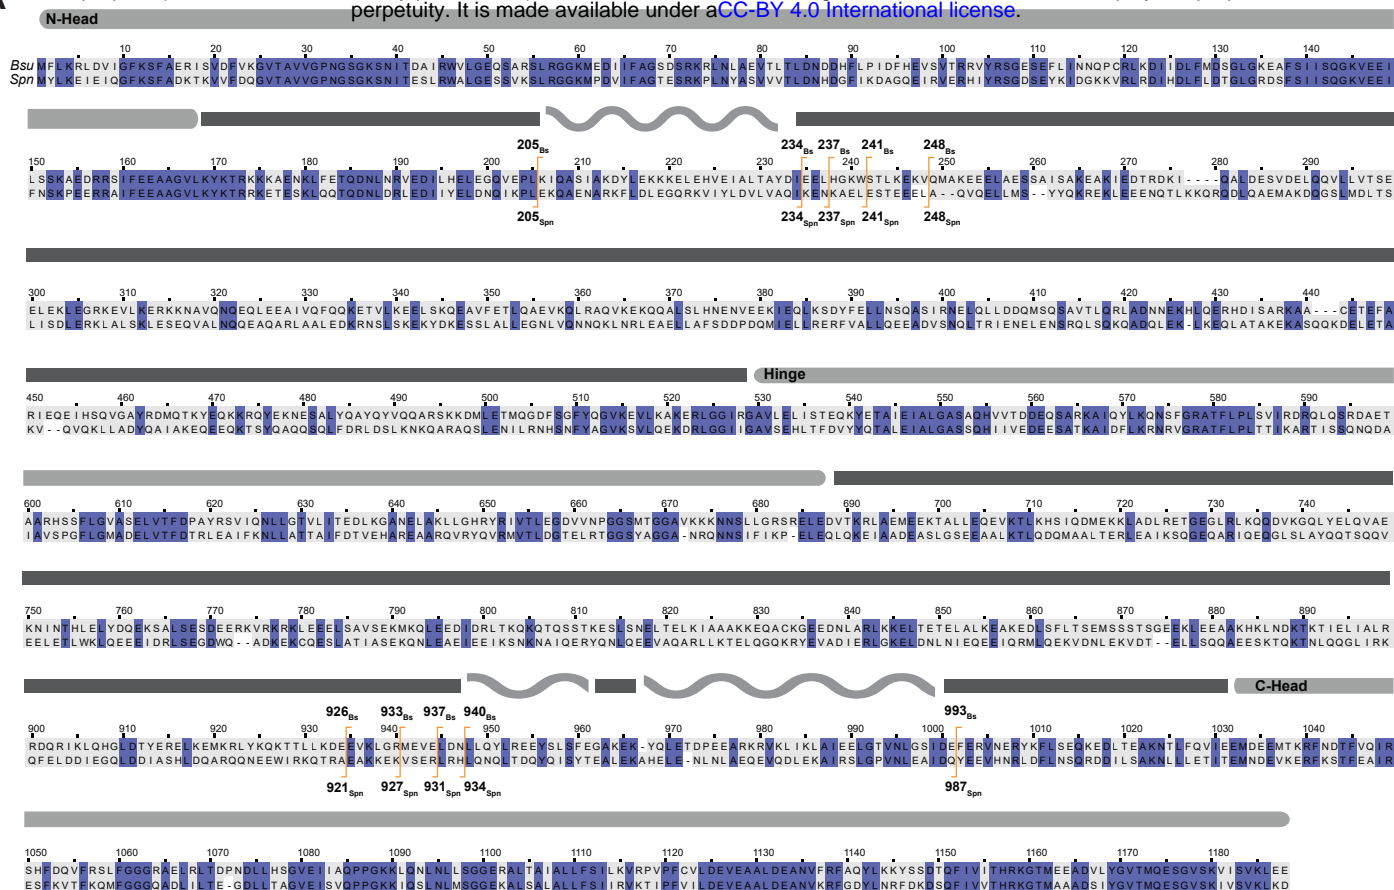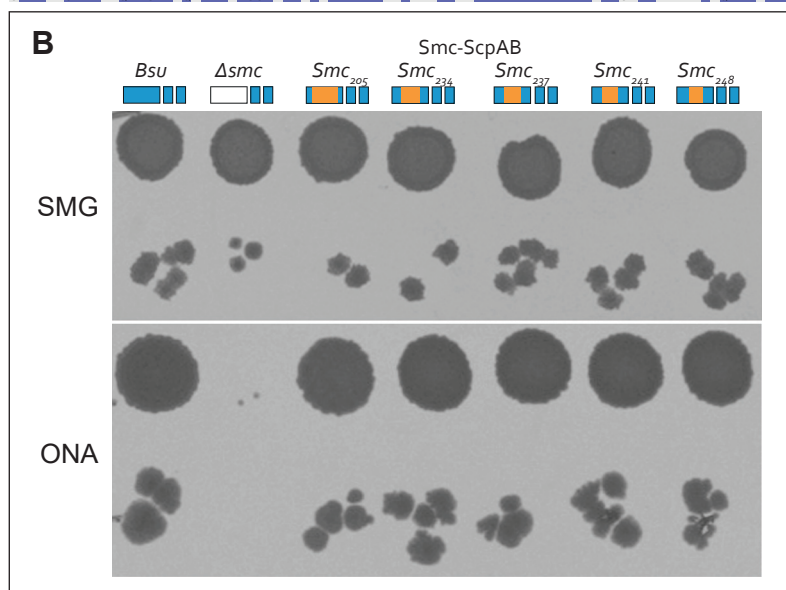

C

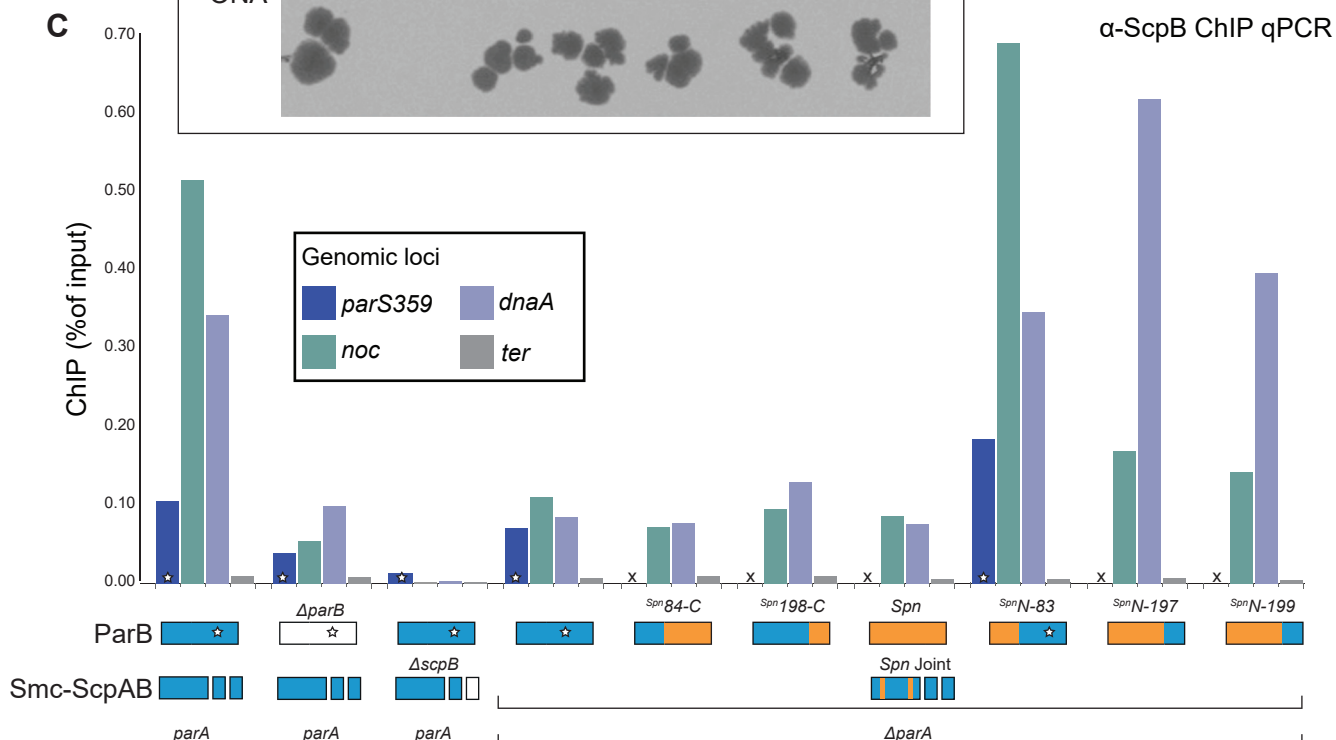

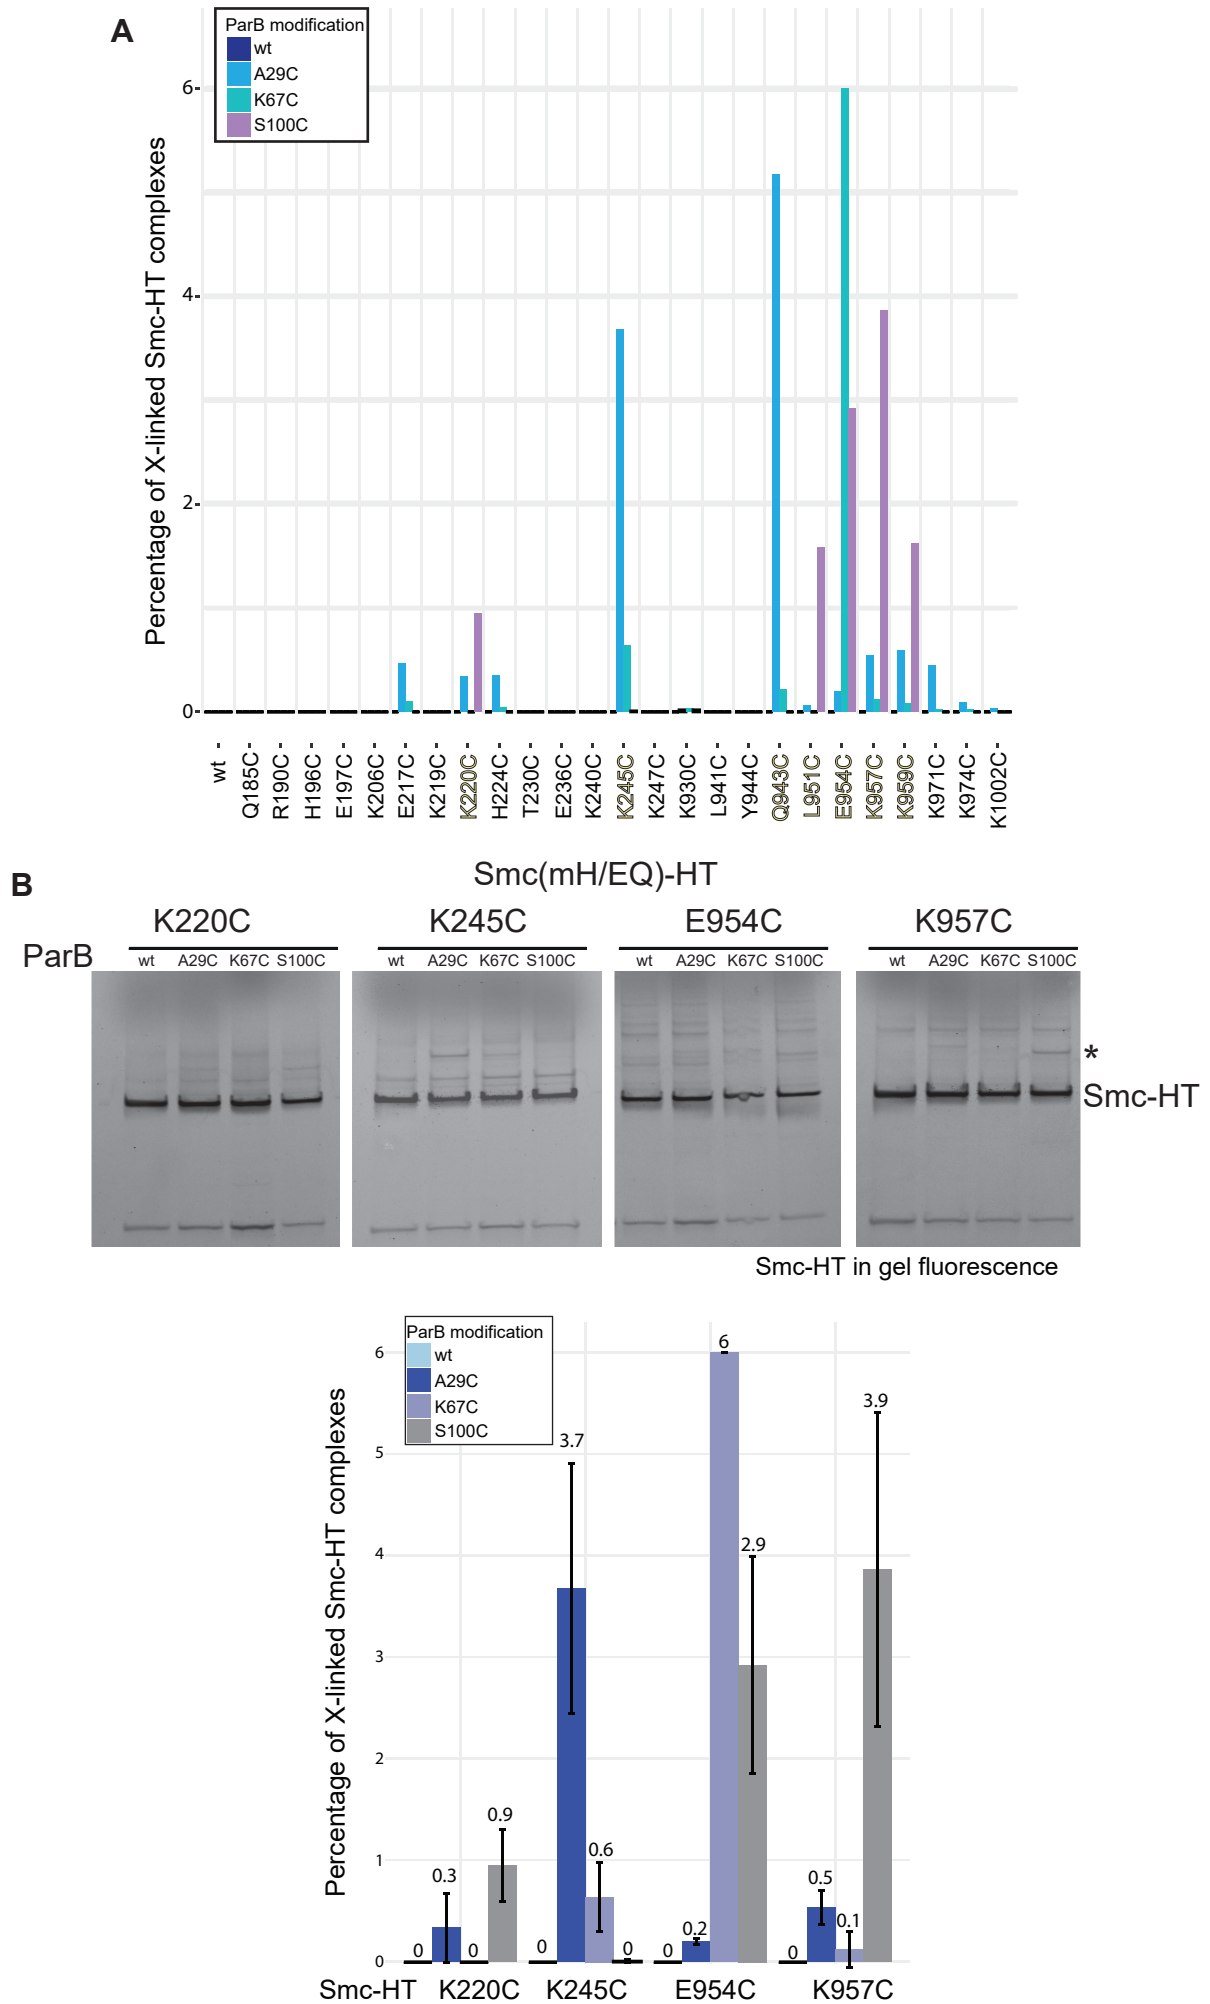

Supplementary Figure 5

**A**

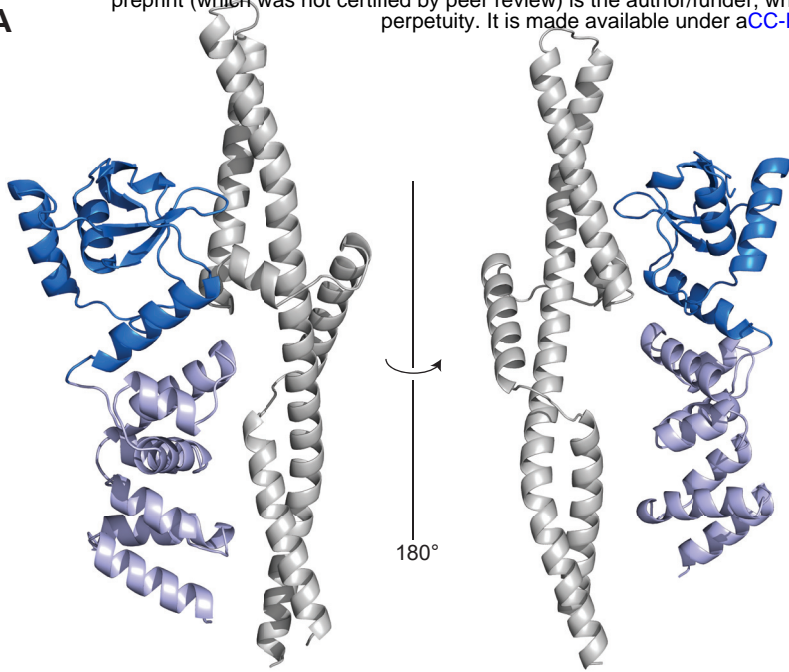

**C**

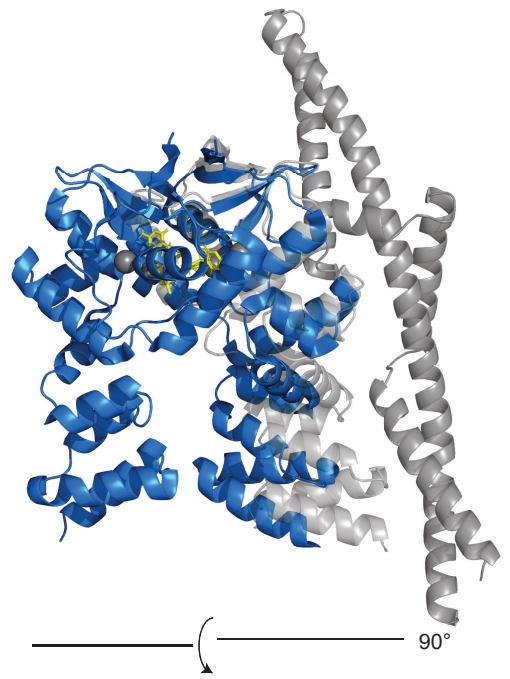

**B**

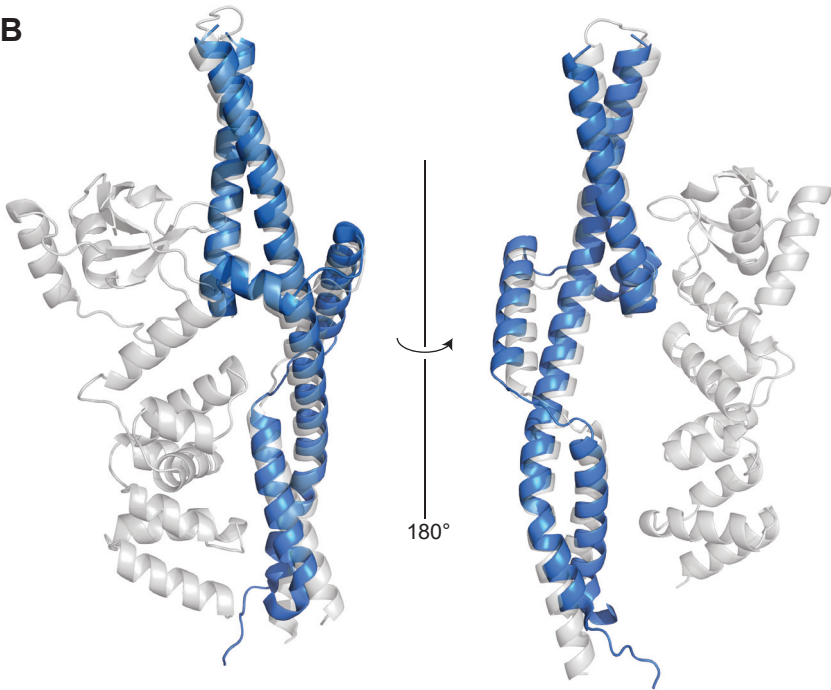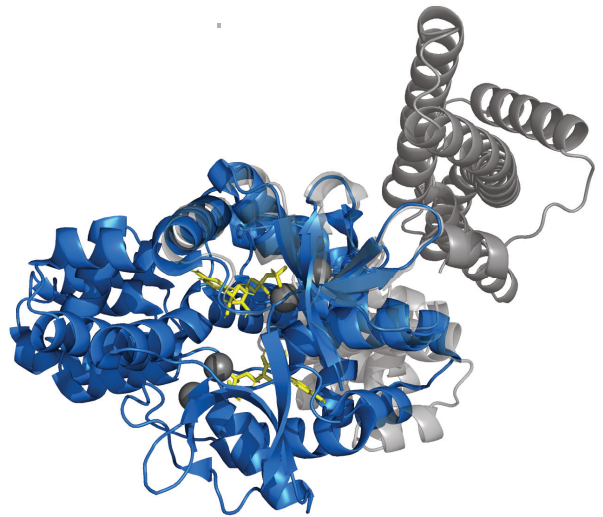

Supplementary Figure 6



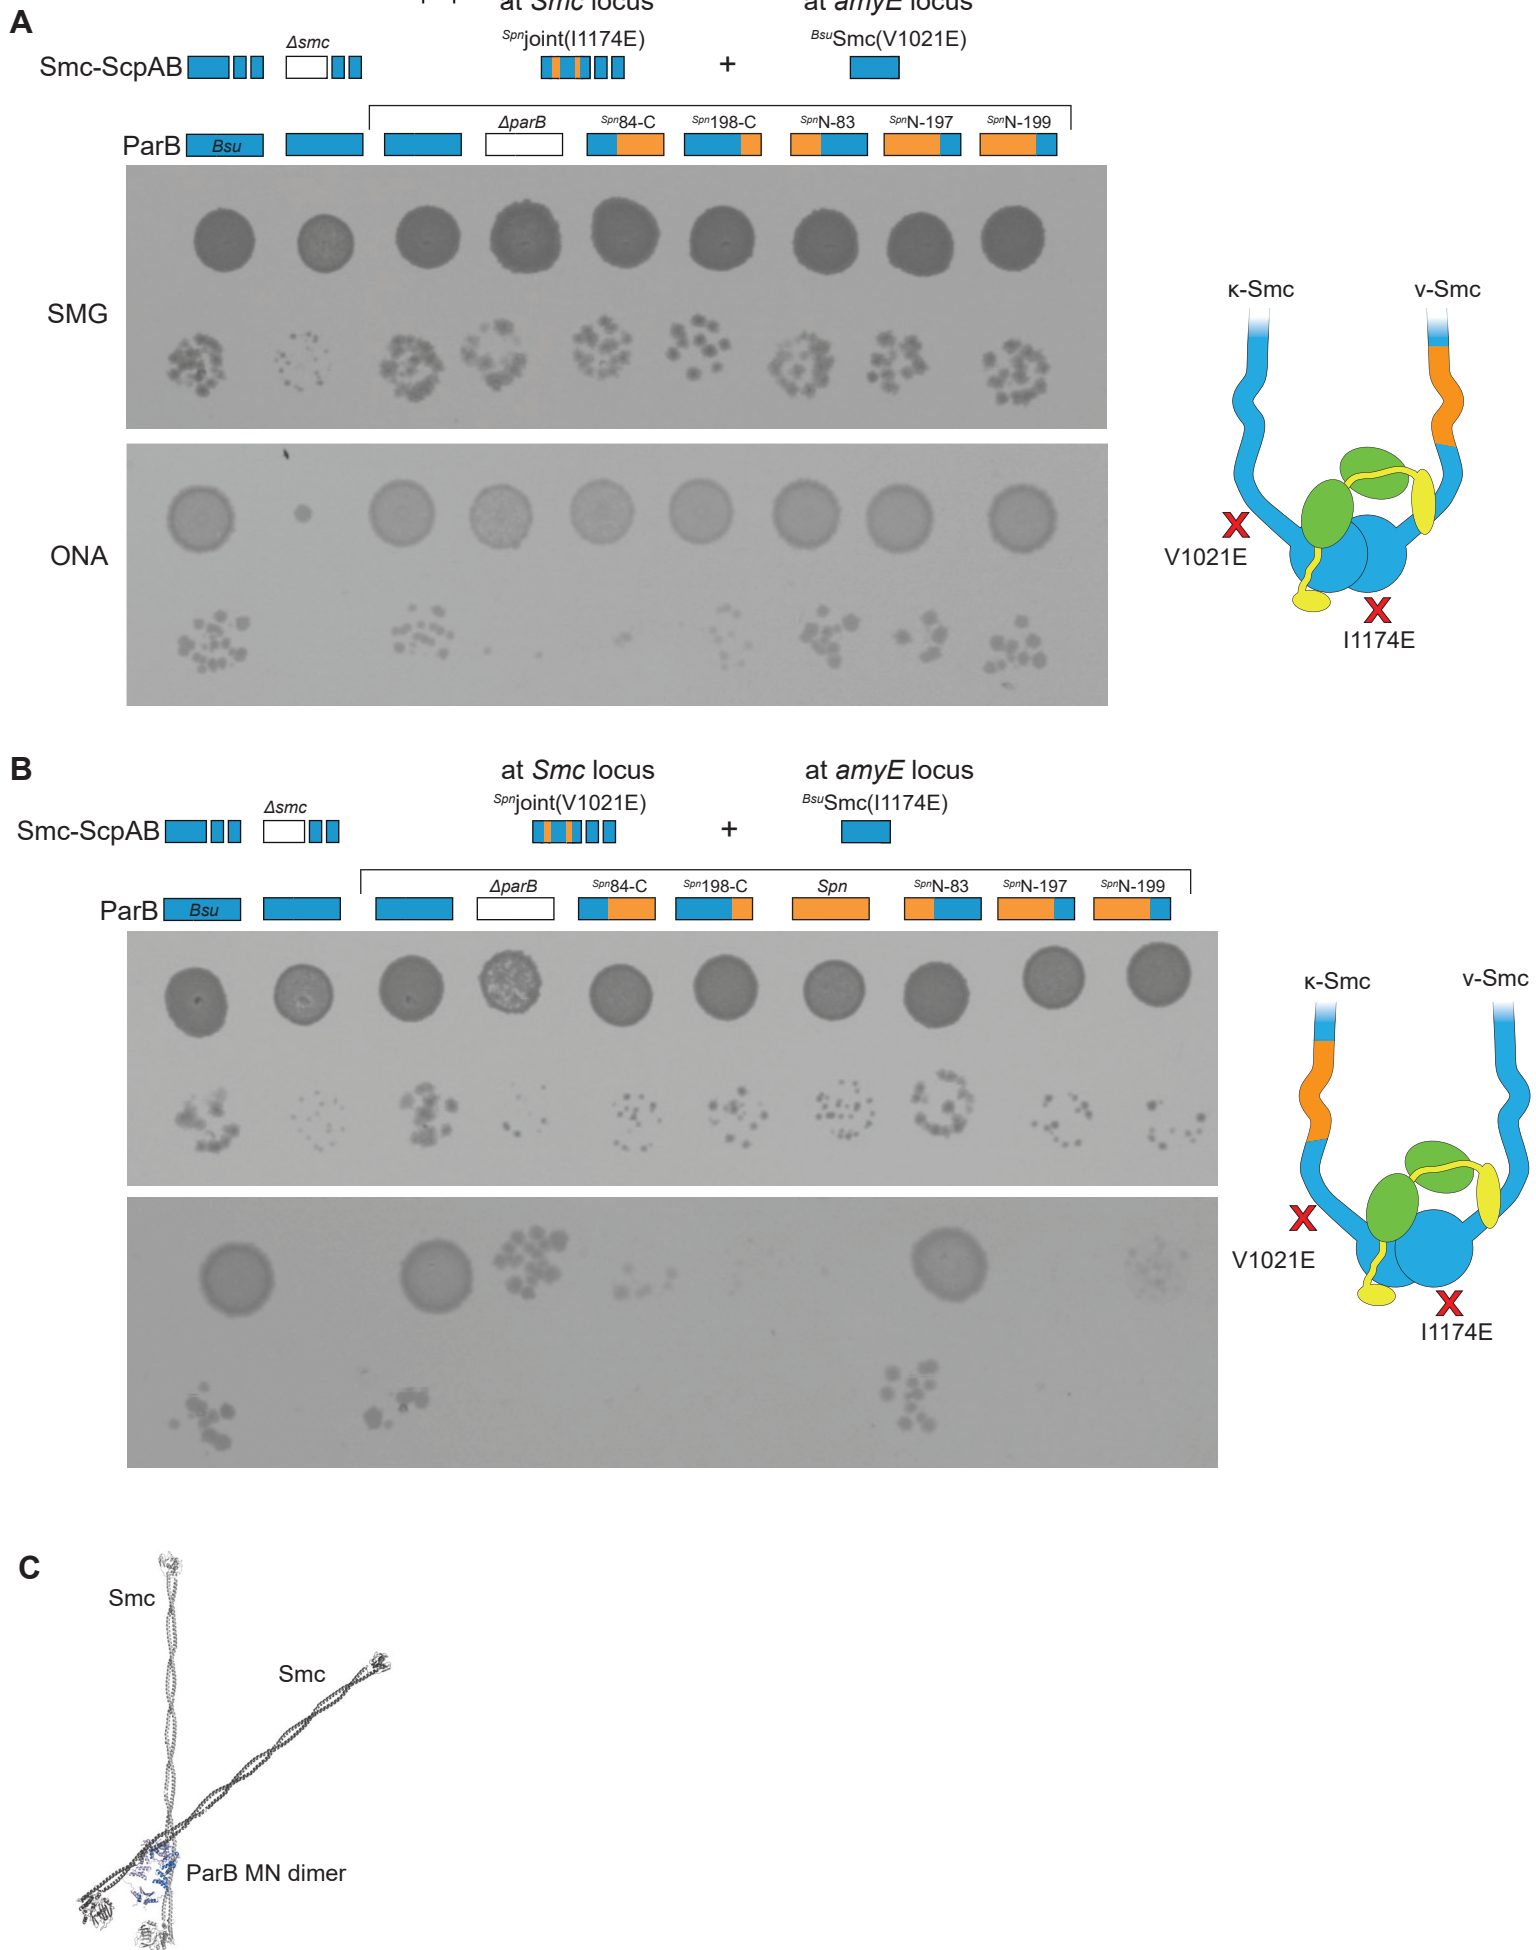

Source: https://www.biorxiv.org/content/10.1101/2021.12.15.472096v1.full.pdf
